# Supplementary material
Source: PubMed Central journal article supplement (PMC7604888)
Supplement: NIHMS1632167-supplement-Supplement1.pdf [file NIHMS1632167-supplement-Supplement1.pdf]

## Supplementary Appendix

This appendix has been provided by the authors to give readers additional information about their work.

Supplement to: Stanley KE, Giordano J, Thorsten V, et al. Causal genetic variants in stillbirth. *N Engl J Med* 2020;383:1107-16. DOI: [10.1056/NEJMoa1908753](https://doi.org/10.1056/NEJMoa1908753)

## Table of Contents

|                                                                                                                                                                                            |    |
|--------------------------------------------------------------------------------------------------------------------------------------------------------------------------------------------|----|
| <i>Stillbirth Collaborative Research Network (SCRN) membership</i> .....                                                                                                                   | 3  |
| <i>IGM bioinformatics pipeline</i> .....                                                                                                                                                   | 4  |
| <i>Controlling for relatedness and population stratification</i> .....                                                                                                                     | 5  |
| <i>Stillbirth gene set curation</i> .....                                                                                                                                                  | 6  |
| <i>Committee classification of diagnostic genotypes</i> .....                                                                                                                              | 8  |
| <i>Gene-based collapsing analysis</i> .....                                                                                                                                                | 9  |
| <i>Enrichment analysis by permutation</i> .....                                                                                                                                            | 10 |
| <i>Table S1: Full set of genes previously described in stillbirth (n = 221)</i> .....                                                                                                      | 11 |
| <i>Table S2: Autopsy and ultrasound in stillbirth cohort (n=246)</i> .....                                                                                                                 | 17 |
| <i>Table S3. Characteristics by completion of exome sequencing in the analysis among SCRN stillbirths (n=663)</i> .....                                                                    | 18 |
| <i>Table S4. Characteristics by completion of exome sequencing and inclusion in the analysis among SCRN stillbirths with consent for genetic study of the stillborn baby (n=639)</i> ..... | 19 |
| <i>Table S5 : Control cohort sources</i> .....                                                                                                                                             | 20 |
| <i>Table S6: Suggestive variants identified in a stillborn</i> .....                                                                                                                       | 21 |
| <i>Table S7. GO enrichment analysis for known disease genes with diagnostic genotypes in a stillborn case</i> .....                                                                        | 22 |
| <i>Table S8 : Results for the gene-based collapsing analysis</i> .....                                                                                                                     | 23 |
| <i>Table S9: Samples (n=35) harboring at least one loss-of-function variant in a constrained (LOEUF <math>\leq</math> 0.239) gene</i> .....                                                | 24 |
| <i>Table S10. Comparison of loss-of-function signal in constrained (LOEUF<math>\leq</math>0.239) genes across INCODE clinical characteristics</i> .....                                    | 25 |
| <i>Table S11. GO biological processes enrichment analysis for stillbirth candidate disease genes</i> .....                                                                                 | 26 |
| <i>Figure S1: Flow diagram for case cohort</i> .....                                                                                                                                       | 27 |
| <i>Figure S2: Case-level diagnostic pipeline</i> .....                                                                                                                                     | 28 |
| <i>Figure S3. Cohort-level collapsing analysis work flow</i> .....                                                                                                                         | 29 |
| <i>Figure S4 Principal components analysis for ancestry</i> .....                                                                                                                          | 30 |
| <i>Figure S5. Quantile-quantile plots for the protein-coding genes that had at least one case or control qualifying variant per model</i> .....                                            | 31 |

Genes Critical to In Utero Survival  
Supplemental Appendix

Kate E. Stanley<sup>1\*</sup>, B.A., Jessica Giordano<sup>1,2\*</sup>, M.S., C.G.C., Vanessa Thorsten<sup>3</sup>, M.P.H., Christie Buchovecky<sup>4</sup>, Ph.D., Amanda Thomas<sup>4</sup>, Ph.D., Mythily Ganapathi<sup>4</sup>, Ph.D., Jun Liao<sup>4</sup>, Ph.D., Avinash V. Dharmadhikari<sup>4</sup>, Ph.D., Anya Revah-Politi<sup>1</sup>, M.S., C.G.C., Michelle Ernst<sup>1</sup>, M.S., C.G.C., Natalie Lippa<sup>1</sup>, M.S., C.G.C., Halie Holmes<sup>1</sup>, M.S., C.G.C., Gundula Povysil<sup>1</sup>, M.D., Ph.D., Joseph Hostyk<sup>1</sup>, B.S., Corette B. Parker<sup>3</sup>, Dr.PH., M.S., Robert Goldenberg<sup>2</sup>, M.D., George R. Saade<sup>5</sup>, M.D., Donald J. Dudley<sup>6</sup>, M.D., Halit Pinar<sup>7</sup>, M.D., Carol Hogue<sup>8</sup>, Ph.D. M.P.H., Uma M. Reddy<sup>9</sup>, M.D., M.P.H. Robert M. Silver<sup>10</sup>, M.D., Vimla Aggarwal<sup>1,4</sup>, M.B.B.S., Andrew S. Allen<sup>11</sup>, Ph.D., Ronald J. Wapner<sup>1,2\*</sup>, M.D., David B. Goldstein<sup>1\*</sup>, Ph.D.

<sup>1</sup> Institute of Genomic Medicine, Columbia University Medical Center, New York, NY

<sup>2</sup> Department of Obstetrics and Gynecology, Columbia University Medical Center, New York, NY

<sup>3</sup> RTI International, Research Triangle Park, NC

<sup>4</sup> Department of Pathology and Cell Biology, Columbia University Medical Center, New York, NY

<sup>5</sup> Departments of OB-GYN and Cell Biology, The University of Texas Medical Branch, Galveston, TX

<sup>6</sup> Division of Maternal-Fetal Medicine Department of Obstetrics and Gynecology, University of Virginia School of Medicine, Charlottesville VA

<sup>7</sup> Division of Perinatal and Pediatric Pathology, Women and Infants Hospital, The Warren Alpert School of Medicine of Brown University, Providence, RI.

<sup>8</sup> Rollins School of Public Health, Emory University, Atlanta, GA

<sup>9</sup> Eunice Kennedy Shriver National Institute of Child Health and Human Development, NIH, Pregnancy and Perinatology Branch, Bethesda, MD

<sup>10</sup> University of Utah and Intermountain Healthcare, Salt Lake City UT

<sup>11</sup> Department of Biostatistics and Bioinformatics, Duke University, Durham, NC

\*,\*\* Represent equal contribution

## Stillbirth Collaborative Research Network (SCRN) membership

The following institutions and researchers compose the Stillbirth Collaborative Research Network: University of Texas Health Science Center at San Antonio—Donald J. Dudley, Deborah L. Conway, Karen Aufdemorte, Angela Rodriguez, Monica Pina; University of Utah School of Medicine—Robert M. Silver, Michael W. Varner, Kristi Nelson; Emory University School of Medicine and the Rollins School of Public Health—Carol J. Rowland Hogue, Barbara J. Stoll, Janice Daniels Tinsley, Bahig Shehata, Carlos Abramowsky; Brown University—Donald Coustan, Halit Pinar, Marshall Carpenter, Susan Kubaska; University of Texas Medical Branch at Galveston—George R. Saade, Radek Bukowski, Jennifer Lee Rollins, Hal Hawkins, Elena Sbrana; RTI International—Corette B. Parker, Matthew A. Koch, Vanessa R. Thorsten, Holly Franklin, Pinliang Chen; Pregnancy and Perinatology Branch, Eunice Kennedy Shriver National Institute of Child Health and Human Development, National Institutes of Health—Marian Willinger, Uma M. Reddy; Columbia University Medical Center—Robert L. Goldenberg.

## IGM bioinformatics pipeline

DNA was extracted with the use of established methods. Concentrations for the samples and an estimated purity (260nm/280nm ratio) were determined by UV spectrophotometry (Nanodrop, Thermo Scientific, Wilmington, DE). Samples were analyzed by agarose gel electrophoresis to visualize sample integrity.

Exomes were captured using either the IDT xGen Exome Research Panel V1.0 (Integrated DNA Technologies, Coralville, IA, USA), the Agilent All Exon (65 MB; Agilent Technologies, Santa Clara, CA, USA) kit or the Nimblegen SeqCap EZ (version 2.0 or 3.0) Exome Enrichment kit (Roche NimbleGen, Madison, WI, USA) and sequenced according to standard protocols on Illumina's (Illumina, San Diego, CA, USA) NovaSeq 6000 and HiSeq2500 platforms. The sequence data from cases and controls were processed using the same Institute for Genomic Medicine's in-house Analysis Tool for Annotated Variants (ATAV)<sup>1</sup>.

As detailed in earlier work, reads were aligned to the reference genome (Genome Reference Consortium build 37, human genome 19) using DRAGEN (Edico Genome, San Diego, CA, USA) and duplicates were marked with Picard (Broad Institute, Boston, MA, USA). Variant and genotype calling was performed using Genome Analysis Toolkit (GATK - Broad Institute, Boston, MA, USA) Best Practices recommendations v3.6. Finally, variants were annotated with ClinEff and ATAV<sup>1</sup>.

Variants were further required to have: i) at least 10-fold coverage, ii) quality score (QUAL) of at least 50, iii) genotype quality (GQ) score of at least 20, iv) quality by depth (QD) score of at least 5, v) mapping quality (MQ) score of at least 40, vi) read position rank sum (RPRS) score greater than -3, vii) mapping quality rank sum (MQRS) score greater than -10, viii) indels were required to have a maximum Fisher's strand bias (FS) of 200, ix) for heterozygous genotypes, the alternative allele ratio was required to be  $\geq 30\%$ . Finally, variants were excluded if they were among a predefined list of known sequencing artifacts or if they were marked by EVS (<http://evs.gs.washington.edu/EVS/>) or ExAC (<http://exac.broadinstitute.org/about>) as being problematic variants.

Samples with  $>8\%$  contamination according to VerifyBamID were also removed<sup>2</sup>. Lastly, samples were required to have  $>85\%$  of 33.76 MB CCDS (release 20) protein coding sites covered at  $10\times$ <sup>3</sup>.

## Controlling for relatedness and population stratification

We used ATAV to create a PED and MAP pair on 7,947 samples (cases and controls) sequenced at the Institute for Genomic Medicine, Columbia University, and 12,840 SNPs of interest. ATAV uses a SNP set generated by taking intermediate MAF SNPs from a large set of exome samples of varied ancestry, restricted to the targeted regions of the Nextera 37 MB kit (as it is the smallest subset of targeted regions for all IGM samples), and finally LD-pruned<sup>1</sup>. We then ran KING to estimate pairwise kinship coefficients. We then produced a new pared down sample file, in which we removed at least one individual in every pair of samples related second-degree or greater favoring the inclusion of cases over controls (relatedness threshold = 0.0884). EIGENSTRAT was used to calculate the top 10 principal components (PCs) on 7,819 unrelated samples. As in other work, samples were removed as “ethnicity outliers” if they exceeded  $\pm 6$  standard deviations across any principal component (Figure S4 in Supplemental Appendix)<sup>4</sup>.

## Stillbirth gene set curation

In order to generate an exhaustive list of genes previously implicated in stillbirth (Table S1 in Supplementary Appendix), we took the union of the following searches yielding 221 unique genes:

1. Clinical synopses in the Online Inheritance in Man (OMIM) database are highly variable and interchange closely related terms. In order to capture the greatest number of genes previously reported in stillbirth in OMIM, we first looked through all symptoms listed in the category ‘prenatal Manifestations’, ‘prenatal Manifestations Delivery’, ‘prenatal Manifestations Maternal’, ‘prenatal Manifestations Placenta And Umbilical Cord’, ‘prenatal Manifestations Amniotic Fluid’, and ‘prenatal Manifestations Movement’ and chose all symptoms that described stillbirth: “stillbirth”, “stillborn”, “embryonic lethality”, “perinatal lethality”, “neonatal lethality”, “fetal lethality”, “fetal demise”, “embryonic demise”, “perinatal demise”, “neonatal demise”, “perinatal death”, “embryonic death”, “fetal death”, “neonatal death”, “intrauterine death”. We then scraped the full OMIM database for all genes associated with conditions that have one of these terms anywhere in the clinical synopsis regardless of inheritance pattern. This search yielding 52 unique genes.
2. We also considered 964 “high evidence” genes on the ‘R21 Fetal Anomalies with a likely genetic cause’ panel overseen by the NGS Genomic Medicine Service. The Fetal anomalies panel is based on a targeted virtual gene panel for developmental disorders developed by the Prenatal Assessment of Genomes and Exomes (PAGE) group. The PAGE gene list underwent expert review and curation to form the Fetal anomalies panel by the NGS Genomic Medicine Service. Genes were given a final “high evidence” rating only if the corresponding phenotype was likely to present in a fetus and the evidence was considered sufficient. Separately, we conducted a further literature review for 913 of the 964 genes on the panel that were not contained in the OMIM scrape results. We retained genes previously reported in at least one case of stillbirth (PMID provided; Table S1 in Supplementary Appendix). We did not include genes if the reported case died within the first few days of life or if it was unclear from the report whether the pregnancy resulted in stillbirth or termination. Our review yielded an additional 79 genes (Table S1 in Supplementary Appendix).
3. Certain cardiac channelopathies have been closely associated with sudden cardiac-related death in the setting of a morphologically normal heart and are known to account for a large portion of sudden infant death cases<sup>5</sup>. These include long QT syndrome (LQTS), catecholaminergic polymorphic ventricular tachycardia (CPVT), and Brugada syndrome (BrS). Additionally, cardiomyopathies, including hypertrophic cardiomyopathy (HCM), dilated cardiomyopathy (DCM), and arrhythmogenic

cardiomyopathy (ACM), are potentially lethal and in certain cases can display minimal to no structural abnormalities in the heart. It has been suggested that a considerable portion of sudden infant death cases without morphological abnormalities in the heart may also be due to cardiomyopathy. Moreover, these channelopathy and cardiomyopathy disorders have each been reported in at least one instance of stillbirth. Thus, we include 94 cardiac-related sudden death-susceptibility genes curated by Narula *et al.* (2015).



## Committee classification of diagnostic genotypes

Molecular diagnoses were classified as either “Pathogenic” or “Likely pathogenic” (P/LP) according to the American College of Medical Genetics (ACMG) criteria or “suggestive” by a multidisciplinary clinical and genetics team.

Committee classification of “suggestive” and not P/LP was based on the following flags:

1. Presence of greater than one allele of the exact variant in the gnomAD v2.1.1 control cohort (n=60,146).
2. Lack of convincing literature to substantiate the classification of the variant as P/LP in variant databases (it is well recognized that most variant databases are not well curated)<sup>6,7</sup>.
3. Mismatch in predicted variant effect of observed variant and previously reported disease variants i.e. identification of a missense variant in a gene where the majority (80-85%) of previously reported variants are loss-of-function variants.

## Gene-based collapsing analysis

We performed a standard gene-based collapsing analysis to identify individual genes with significant enrichment of qualifying variants (QV) in cases compared to healthy controls. As described in earlier work, the term QV refers to a subset of variation within the sequence data that meet criteria designed to enrich for pathogenic variants<sup>8</sup>. This analysis used established sets of criteria for selection of QV based on the variant effect annotation and minor allele frequency (Figure S5 in Supplementary Appendix)<sup>8</sup>. A two-tailed Fisher's exact test was performed across 18 653 consensus coding sequence protein-coding genes for 3 models (Figure S5 in Supplemental Appendix). Bonferroni-adjusted significance threshold was therefore  $0.05/[18\ 654 \times 3] = 8.9 \times 10^{-7}$ .

Q-Q plots were generated as previously described<sup>2</sup>. To restate, using the in-house bioinformatics tool ATAV we generated a Q-Q plot based on 1,000 random permutations of case/control labels. The mean of each p-value rank is then calculated and plotted against the observed p-values. The plot also includes the 2.5th percentile and 97.5th percentile of expected p-values at each rank, which are displayed as green and yellow lines, respectively (Figure S5 in Supplementary Appendix). The lambda factor displayed on the plot is the slope of the regression line of the observed vs. expected points, after removing p-values of 1 (or  $-\log_{10}(\text{p-value})$  of 0) and p-values of genome-wide significance after Bonferroni correction.

## Enrichment analysis by permutation

The method partitions genes according to every possible intolerance division (gnomAD v2.1.1 loss-of-function observed/expected upper bound fraction; LOEUF<sup>9</sup>), maximizes the enrichment statistic over these divisions, and then assesses the significance of this maximum by permutation. In detail:

Assume there are  $n$  genes taking on  $p$  intolerance (LOEUF) values. Note that  $p$  is less than  $n$  as some genes have the same intolerance score. Let  $G_i$  be the intolerance score of the  $i^{\text{th}}$  gene. Let  $I_{(1)} > I_{(2)} > \dots > I_{(p)}$  be the ordered distinct intolerance scores found among all  $n$  genes.

Create  $p$  gene sets,  $S_j = \{ \text{genes } i \mid G_i \geq I_{(j)} \}$  such that the  $j^{\text{th}}$  gene set will contain all genes whose intolerance score is greater than or equal to the  $j^{\text{th}}$  most extreme intolerance score.

Compute an observed statistic by:

1. Test for loss-of-function case or control enrichment in each gene set using a logistic regression that controls for synonymous variation in the corresponding gene set. Denote the statistic for the  $j^{\text{th}}$  gene set by  $X_j$
2. Minimize p-values over the  $X_j$ 's. Call the min,  $T$ .

Assess the significance of  $T$  using permutation by:

3. Permute case-control labels and repeat steps 1 and 2.
4. Repeat 3 a large number of times  $b$ , so that you get a large sample from the permutation distribution of the procedure. Label the resulting mins from these permutations  $T_1, T_2, \dots, T_b$ . In our application  $b = 10,000$ .

The empirical p-value is then the proportion of permuted mins that are as large or larger than the observed min  $T$ , i.e.,  $p = \sum 1(T_l \geq T)/b$ , where the sum is taken for  $l = 1$  to  $b$  and  $1(\cdot)$  is an indicator function.

To calculate the 95% confidence interval [CI] let  $X_b = 1$  if both the permuted minimum p-value is as small or smaller than the observed p-value ( $X_b = 0$  otherwise). Note that  $\sum(X_b)/n$  is our empirical p-value estimate (0.0061) where  $n=10,000$ . Let  $p$  be the true proportion of permutations that lead to a p-value as extreme (i.e.,  $p$  is our true p-value). Then  $X_b$  is a Bernoulli random variable and hence its variance is  $p*(1-p)$ . From this we can deduce that the  $\text{Var}(\sum(X_b)/n) = n*p*(1-p)/n^2 = p*(1-p)/n$ . The central limit theorem can be applied in this case and we have that  $\text{Dist}(\sum(X_b)/n) \sim \text{Normal}(p, p*(1-p)/n)$  and this implies (plugging in our empirical estimator for  $p$ ) that the 95% CI for  $p$  can be given by  $0.0061 \pm 1.96 * \sqrt{0.0061*(1-0.0061)/10000}$ .

**Table S1: Full set of genes previously described in stillbirth (n = 221).** Source = indicates whether the gene came from (1) OMIM: keyword identified (2) the Fetal anomaly panel literature review with PMID provided or (3) Narula et al. (2015) cardiac-related sudden death-susceptibility gene set (see Methods in Supplementary Appendix for detail).

| Gene     | Source                                                                                                                | Model Of Inheritance         | Disease Association                                                                                                                                                                               |
|----------|-----------------------------------------------------------------------------------------------------------------------|------------------------------|---------------------------------------------------------------------------------------------------------------------------------------------------------------------------------------------------|
| ABCB4    | OMIM:fetal death                                                                                                      | BOTH BIALLELIC & MONOALLELIC | CHOLESTASIS, INTRAHEPATIC, OF PREGNANCY 3; ICP3                                                                                                                                                   |
| ACE      | PMID:22095942                                                                                                         | BIALLELIC                    | Renal tubular dysgenesis 267430                                                                                                                                                                   |
| ACTB     | PMID:29261186                                                                                                         | MONOALLELIC                  | BARAITSER-WINTER SYNDROME;ACTB Haploinsufficiency syndtome                                                                                                                                        |
| ACTC1    | Narula et al. (2015)                                                                                                  | MONOALLELIC                  | hypertrophic cardiomyopathy                                                                                                                                                                       |
| ACTN2    | Narula et al. (2015)                                                                                                  | MONOALLELIC                  | dilated cardiomyopathy   hypertrophic cardiomyopathy                                                                                                                                              |
| AKAP9    | Narula et al. (2015)                                                                                                  | MONOALLELIC                  | long QT syndrome                                                                                                                                                                                  |
| AKT1     | PMID:28431992                                                                                                         | MONOALLELIC                  | PROTEUS SYNDROME                                                                                                                                                                                  |
| ALPL     | OMIM:stillborn                                                                                                        | BIALLELIC                    | HYPOPHOSPHATASIA, INFANTILE                                                                                                                                                                       |
| AMER1    | PMID:19079258                                                                                                         | MONOALLELIC                  | OSTEOPATHIA STRIATA WITH CRANIAL SCLEROSIS                                                                                                                                                        |
| ANK2     | Narula et al. (2015)                                                                                                  | MONOALLELIC                  | long QT syndrome                                                                                                                                                                                  |
| ANKRD1   | Narula et al. (2015)                                                                                                  | #N/A                         | dilated cardiomyopathy   hypertrophic cardiomyopathy                                                                                                                                              |
| ARID1B   | Kliegman RM, Bordini BJ. Undiagnosed and Rare Diseases in Children. <i>Pediatr Clin North Am.</i> 2017 Feb 1;64(1):i. | MONOALLELIC                  | MENTAL RETARDATION, AUTOSOMAL DOMINANT 12;COFFIN SIRIS SYNDROME                                                                                                                                   |
| ARSE     | PMID:9719382                                                                                                          | X-LINKED                     | CHONDRODYSPLASIA PUNCTATA 1, X-LINKED                                                                                                                                                             |
| ARX      | PMID:14722918                                                                                                         | X-LINKED                     | PARTINGTON SYNDROME;MENTAL RETARDATION X-LINKED ARX-RELATED;LISSENCEPHALY X-LINKED TYPE 2;AGENESIS OF THE CORPUS CALLOSUM WITH ABNORMAL GENITALIA;EPILEPTIC ENCEPHALOPATHY EARLY INFANTILE TYPE 1 |
| ATP8B1   | OMIM:fetal death                                                                                                      | BOTH BIALLELIC & MONOALLELIC | CHOLESTASIS, INTRAHEPATIC, OF PREGNANCY, 1; ICP1                                                                                                                                                  |
| B4GALT7  | PMID:31278392                                                                                                         | BIALLELIC                    | EHLERS-DANLOS SYNDROME PROGEROID TYPE                                                                                                                                                             |
| BAG3     | Narula et al. (2015)                                                                                                  | MONOALLELIC                  | dilated cardiomyopathy                                                                                                                                                                            |
| CACNA1C  | Narula et al. (2015)                                                                                                  | MONOALLELIC                  | brugada syndrome   long QT syndrome                                                                                                                                                               |
| CACNA2D1 | Narula et al. (2015)                                                                                                  | #N/A                         | brugada syndrome                                                                                                                                                                                  |
| CACNB2   | Narula et al. (2015)                                                                                                  | #N/A                         | brugada syndrome                                                                                                                                                                                  |
| CALM1    | Narula et al. (2015)                                                                                                  | MONOALLELIC                  | catecholiminergic polymorphic ventricular cardiomyopathy   long QT syndrome                                                                                                                       |
| CALM2    | Narula et al. (2015)                                                                                                  | MONOALLELIC                  | long QT syndrome                                                                                                                                                                                  |
| CALR3    | Narula et al. (2015)                                                                                                  | MONOALLELIC                  | hypertrophic cardiomyopathy                                                                                                                                                                       |
| CASQ2    | Narula et al. (2015)                                                                                                  | BIALLELIC                    | catecholiminergic polymorphic ventricular cardiomyopathy                                                                                                                                          |
| CAV3     | Narula et al. (2015)                                                                                                  | MONOALLELIC                  | long QT syndrome                                                                                                                                                                                  |
| CC2D2A   | PMID:26862157                                                                                                         | BIALLELIC                    | JOUBERT SYNDROME 9;COACH SYNDROME;MECKEL SYNDROME, TYPE 6                                                                                                                                         |
| CCBE1    | PMID:19911200                                                                                                         | BIALLELIC                    | HENNEKAM LYMPHANGIECTASIA-LYMPHEDEMA SYNDROME                                                                                                                                                     |
| CDKN1C   | PMID:20484977                                                                                                         | MONOALLELIC                  | BECKWITH-WIEDEMANN SYNDROME;IMAGe Syndrome                                                                                                                                                        |
| CEP120   | OMIM:fetal death                                                                                                      | BIALLELIC                    | SHORT-RIB THORACIC DYSPLASIA 13 WITH OR WITHOUT POLYDACTYLY; SRTD13                                                                                                                               |

|         |                                              |                              |                                                                                                                                                                                                                                                |
|---------|----------------------------------------------|------------------------------|------------------------------------------------------------------------------------------------------------------------------------------------------------------------------------------------------------------------------------------------|
| CEP290  | PMID:24428858                                | BIALLELIC                    | JOUBERT SYNDROME TYPE 5;LEBER CONGENITAL AMAUROSIS TYPE 10;SENIOR-LOKEN SYNDROME TYPE 6;BARDET-BIEDL SYNDROME TYPE 14;MECKEL SYNDROME TYPE 4                                                                                                   |
| CHRNA1  | PMID:23037934                                | BIALLELIC                    | MULTIPLE PTERYGIUM SYNDROME LETHAL TYPE;Multiple pterygium syndrome, lethal type, 253290                                                                                                                                                       |
| CHRND   | PMID:27245440                                | MONOALLELIC                  | MYASTHENIC SYNDROME, CONGENITAL, 3B, FAST-CHANNEL; CMS3B   MYASTHENIC SYNDROME, CONGENITAL, 3A, SLOW-CHANNEL; CMS3A   MYASTHENIC SYNDROME, CONGENITAL, 3C, ASSOCIATED WITH ACETYLCHOLINE RECEPTOR DEFICIENCY; CMS3C                            |
| CHRNG   | PMID:27245440                                | BIALLELIC                    | MULTIPLE PTERYGIUM SYNDROME ESCOBAR VARIANT                                                                                                                                                                                                    |
| CHST14  | PMID:11370633                                | BIALLELIC                    | EHLERS-DANLOS SYNDROME MUSCULOCONTRACTURAL TYPE                                                                                                                                                                                                |
| CHUK    | PMID:20961246                                | BIALLELIC                    | COCOON SYNDROME                                                                                                                                                                                                                                |
| CNTNAP1 | PMID:28254648                                | BIALLELIC                    | LETHAL CONGENITAL CONTRACTURE SYNDROME 7                                                                                                                                                                                                       |
| COG8    | PMID:30690882                                | BIALLELIC                    | COG8-CDG                                                                                                                                                                                                                                       |
| COL11A1 | OMIM:stillborn                               | BIALLELIC                    | FIBROCHONDROGENESIS 1; FBCG1                                                                                                                                                                                                                   |
| COL11A2 | PMID:28749478                                | BOTH MONOALLELIC & BIALLELIC | WEISSENBACHER-ZWEYMUELLER SYNDROME;DEAFNESS AUTOSOMAL RECESSIVE TYPE 53;AUTOSOMAL RECESSIVE OTOSPONDYLOMEGAEPIPHYSEAL DYSPLASIA;DEAFNESS AUTOSOMAL DOMINANT TYPE 13;STICKLER SYNDROME TYPE 3                                                   |
| COL1A1  | PMID:18412368                                | MONOALLELIC                  | COL1A1/2-RELATED OSTEOGENESIS IMPERFECTA;EHLERS-DANLOS SYNDROME, CLASSIC TYPE, COL1A1-RELATED;OSTEOGENESIS IMPERFECTA TYPE III;EHLERS-DANLOS SYNDROME TYPE VIIA;OSTEOGENESIS IMPERFECTA TYPE IIA;CAFFEY DISEASE;OSTEOGENESIS IMPERFECTA TYPE I |
| COL1A2  | PMID:26147564                                | BOTH MONOALLELIC & BIALLELIC | Ehlers-Danlos syndrome;Osteogenesis imperfecta                                                                                                                                                                                                 |
| COL2A1  | OMIM:stillborn                               | MONOALLELIC                  | ACHONDROGENESIS, TYPE II; ACG2                                                                                                                                                                                                                 |
| COQ4    | PMID:25658047                                | BIALLELIC                    | COENZYME Q10 DEFICIENCY, PRIMARY, 7                                                                                                                                                                                                            |
| COQ9    | PMID:29560582                                | BIALLELIC                    | COENZYME Q10 DEFICIENCY                                                                                                                                                                                                                        |
| CPT2    | OMIM:sudden death within first days of life  | BIALLELIC                    | CARNITINE PALMITOYLTRANSFERASE II DEFICIENCY, INFANTILE   CARNITINE PALMITOYLTRANSFERASE II DEFICIENCY, LETHAL NEONATAL                                                                                                                        |
| CRB2    | PMID:28425981                                | BIALLELIC                    | VENTRICULOMEGALY WITH CYSTIC KIDNEY DISEASE                                                                                                                                                                                                    |
| CREBBP  | PMID:30633342                                | MONOALLELIC                  | CREBBP intellectual disability without typical RTS features;RUBINSTEIN-TAYBI SYNDROME TYPE 1                                                                                                                                                   |
| CRYAB   | Narula et al. (2015)                         | BOTH BIALLELIC & MONOALLELIC | dilated cardiomyopathy                                                                                                                                                                                                                         |
| CSPP1   | PMID:24360803                                | BIALLELIC                    | JOUBERT SYNDROME WITH OR WITHOUT JEUNE ASPHYXIATING THORACIC DYSTROPHY                                                                                                                                                                         |
| CSRP3   | Narula et al. (2015)                         | MONOALLELIC                  | dilated cardiomyopathy   hypertrophic cardiomyopathy                                                                                                                                                                                           |
| CTF1    | Narula et al. (2015)                         | #N/A                         | dilated cardiomyopathy                                                                                                                                                                                                                         |
| CTSA    | PMID:28749478                                | BIALLELIC                    | GALACTOSIALIDOSIS                                                                                                                                                                                                                              |
| CTSD    | PMID:16670177                                | BIALLELIC                    | NEURONAL CEROID LIPOFUSCINOSIS TYPE 10                                                                                                                                                                                                         |
| CYP11A1 | PMID:28425981                                | BIALLELIC                    | Adrenal insufficiency, congenital, with 46XY sex reversal, partial or complete 613743                                                                                                                                                          |
| DAG1    | PMID:25934851                                | BIALLELIC                    | MUSCULAR DYSTROPHY-DYSTROGLYCANOPATHY LIMB-GIRDLE TYPE C7                                                                                                                                                                                      |
| DES     | Narula et al. (2015)                         | BOTH BIALLELIC & MONOALLELIC | dilated cardiomyopathy                                                                                                                                                                                                                         |
| DHCR7   | PMID:14735596;<br>PMID:11078571              | BIALLELIC                    | SMITH-LEMLI-OPITZ SYNDROME                                                                                                                                                                                                                     |
| DIS3L2  | PMID:18780370                                | BIALLELIC                    | PERLMAN SYNDROME                                                                                                                                                                                                                               |
| DMD     | Narula et al. (2015)                         | X-LINKED RECESSIVE, Other    | dilated cardiomyopathy                                                                                                                                                                                                                         |
| DMPK    | PMID:9856556                                 | MONOALLELIC                  | DYSTROPHIA MYOTONICA TYPE 1                                                                                                                                                                                                                    |
| DOK7    | OMIM:stillborn                               | BIALLELIC                    | FETAL AKINESIA DEFORMATION SEQUENCE 1; FADS1                                                                                                                                                                                                   |
| DSC2    | Narula et al. (2015)                         | MONOALLELIC                  | arrhythmogenic cardiomyopathy                                                                                                                                                                                                                  |
| DSG2    | Narula et al. (2015)                         | MONOALLELIC                  | arrhythmogenic cardiomyopathy                                                                                                                                                                                                                  |
| DSP     | OMIM:neonatal death;<br>Narula et al. (2015) | BIALLELIC                    | SKIN FRAGILITY-WOOLLY HAIR SYNDROME; SFWHS   EPIDERMOLYSIS BULLOSA, LETHAL ACANTHOLYTIC; EBLA                                                                                                                                                  |
| EMD     | Narula et al. (2015)                         | X-LINKED RECESSIVE           | dilated cardiomyopathy                                                                                                                                                                                                                         |
| ESCO2   | OMIM:stillborn                               | BIALLELIC                    | ROBERTS SYNDROME; RBS                                                                                                                                                                                                                          |
| ETF A   | OMIM:neonatal death                          | BIALLELIC                    | MULTIPLE ACYL-CoA DEHYDROGENASE DEFICIENCY; MADD                                                                                                                                                                                               |
| ETF B   | OMIM:neonatal death                          | BIALLELIC                    | MULTIPLE ACYL-CoA DEHYDROGENASE DEFICIENCY; MADD                                                                                                                                                                                               |
| ETF DH  | OMIM:neonatal death                          | BIALLELIC                    | MULTIPLE ACYL-CoA DEHYDROGENASE DEFICIENCY; MADD                                                                                                                                                                                               |

|         |                                      |                              |                                                                                                                                                                                                                                                                    |
|---------|--------------------------------------|------------------------------|--------------------------------------------------------------------------------------------------------------------------------------------------------------------------------------------------------------------------------------------------------------------|
| EVC2    | PMID:23276573                        | BIALLELIC                    | ELLIS-VAN CREVELD SYNDROME;ACROFACIAL DYSOSTOSIS WEYERS TYPE                                                                                                                                                                                                       |
| EXOSC3  | PMID:24524299                        | BIALLELIC                    | PONTOCEREBELLAR HYPOPLASIA TYPE 1                                                                                                                                                                                                                                  |
| EYA4    | Narula et al. (2015)                 | MONOALLELIC                  | dilated cardiomyopathy                                                                                                                                                                                                                                             |
| FAM111A | PMID:23684011                        | MONOALLELIC                  | KENNY-CAFFEY SYNDROME                                                                                                                                                                                                                                              |
| FAM20C  | PMID:17924334                        | BIALLELIC                    | RAINE SYNDROME                                                                                                                                                                                                                                                     |
| FANCB   | PMID:28425981                        | X-LINKED                     | FANCB-RELATED FANCONI ANEMIA                                                                                                                                                                                                                                       |
| FBN1    | PMID:16752434                        | BOTH MONOALLELIC & BIALLELIC | SHPRINTZEN-GOLDBERG CRANIOSYNOSTOSIS SYNDROME;MARFAN SYNDROME;MASS SYNDROME/OVERLAP CONNECTIVE TISSUE DISEASE                                                                                                                                                      |
| FBXL4   | PMID:23993193                        | BIALLELIC                    | FATAL ENCEPHALOPATHY, LACTIC ACIDOSIS, AND SEVERE MTDNA DEPLETION IN MUSCLE                                                                                                                                                                                        |
| FCMD    | Narula et al. (2015)                 | BIALLELIC                    | dilated cardiomyopathy                                                                                                                                                                                                                                             |
| FGFR2   | PMID:28425981                        | MONOALLELIC                  | BEARE-STEVENSON CUTIS GYRATA SYNDROME;LACRIMO-AURICULO-DENTO-DIGITAL SYNDROME;JACKSON-WEISS SYNDROME;ACROCEPHALOSYNDACTYLY TYPE V;FAMILIAL SCAPHOCEPHALY SYNDROME;ANTLEY-BIXLER SYNDROME;CROUZON SYNDROME;APERT SYNDROME                                           |
| FGFR3   | PMID:23551494                        | MONOALLELIC                  | LACRIMO-AURICULO-DENTO-DIGITAL SYNDROME;MUENKE SYNDROME;ACHONDROPLASIA;CROUZON SYNDROME WITH ACANTHOSIS NIGRICANS;CAMPTODACTYLY TALL STATURE AND HEARING LOSS SYNDROME;HYPOCHONDROPLASIA;THANATOPHORIC DYSPLASIA TYPE 2;THANATOPHORIC DYSPLASIA TYPE 1             |
| FHL2    | Narula et al. (2015)                 | BIALLELIC                    | dilated cardiomyopathy                                                                                                                                                                                                                                             |
| FKTN    | PMID:28749478                        | BIALLELIC                    | MUSCULAR DYSTROPHY-DYSTROGLYCANOPATHY CONGENITAL WITHOUT MENTAL RETARDATION TYPE B4;CARDIOMYOPATHY DILATED TYPE 1X;MUSCULAR DYSTROPHY-DYSTROGLYCANOPATHY LIMB-GIRDLE TYPE C4;MUSCULAR DYSTROPHY-DYSTROGLYCANOPATHY CONGENITAL WITH BRAIN AND EYE ANOMALIES TYPE A4 |
| FLNA    | OMIM:perinatal lethality   stillborn | X-LINKED                     | MELNICK-NEEDLES SYNDROME; MNS   OTOPALATODIGITAL SYNDROME, TYPE II; OPD2   INTESTINAL PSEUDO OBSTRUCTION, NEURONAL, CHRONIC IDIOPATHIC, X-LINKED   PERIVENTRICULAR NODULAR HETEROTOPIA 1; PVNH1                                                                    |
| FLNB    | OMIM:neonatal death   stillborn      | MONOALLELIC                  | ATELOSTEOGENESIS, TYPE I; AO1   BOOMERANG DYSPLASIA; BOOMD                                                                                                                                                                                                         |
| FLVCR2  | OMIM:neonatal death   stillborn      | BIALLELIC                    | PROLIFERATIVE VASCULOPATHY AND HYDRANENCEPHALY-HYDROCEPHALY SYNDROME; PVHH                                                                                                                                                                                         |
| FOXF1   | PMID:23505205                        | MONOALLELIC                  | ALVEOLAR CAPILLARY DYSPLASIA WITH MISALIGNMENT OF PULMONARY VEINS                                                                                                                                                                                                  |
| FOXP3   | PMID:28425981                        | X-LINKED                     | IPEX SYNDROME                                                                                                                                                                                                                                                      |
| FRAS1   | OMIM:stillborn                       | BIALLELIC                    | FRASER SYNDROME 1; FRASRS1                                                                                                                                                                                                                                         |
| FREM2   | OMIM:stillborn                       | BIALLELIC                    | FRASER SYNDROME 1; FRASRS1                                                                                                                                                                                                                                         |
| FXN     | Narula et al. (2015)                 | BIALLELIC                    | hypertrophic cardiomyopathy                                                                                                                                                                                                                                        |
| GATA4   | Narula et al. (2015)                 | MONOALLELIC                  | hypertrophic cardiomyopathy                                                                                                                                                                                                                                        |
| GATAD1  | Narula et al. (2015)                 | BIALLELIC                    | dilated cardiomyopathy                                                                                                                                                                                                                                             |
| GBA     | PMID:12838552                        | BIALLELIC                    | GAUCHER DISEASE TYPE 3C;GAUCHER DISEASE TYPE 1;GAUCHER DISEASE PERINATAL LETHAL;GAUCHER DISEASE TYPE 3;GAUCHER DISEASE;GAUCHER DISEASE TYPE 2                                                                                                                      |
| GBE1    | PMID:26147564                        | BIALLELIC                    | Glycogen storage disease IV;Polyglucosan body disease, adult form;Fetal akinesia deformation sequence                                                                                                                                                              |
| GDF5    | OMIM:stillborn                       | BIALLELIC                    | CHONDRODYSPLASIA, GREBE TYPE                                                                                                                                                                                                                                       |
| GLA     | Narula et al. (2015)                 | Other                        | hypertrophic cardiomyopathy                                                                                                                                                                                                                                        |
| GLDN    | PMID:27616481                        | BIALLELIC                    | Lethal arthrogyrosis                                                                                                                                                                                                                                               |
| GLE1    | OMIM:neonatal death                  | BIALLELIC                    | LETHAL CONGENITAL CONTRACTURE SYNDROME 1; LCCS1   CONGENITAL ARTHROGRYPOSIS WITH ANTERIOR HORN CELL DISEASE; CAAHD                                                                                                                                                 |
| GPC3    | PMID:29652239                        | X-LINKED                     | SIMPSON-GOLABI-BEHMEL SYNDROME, TYPE 1                                                                                                                                                                                                                             |

|          |                                           |                              |                                                                                                                                            |
|----------|-------------------------------------------|------------------------------|--------------------------------------------------------------------------------------------------------------------------------------------|
| GPD1L    | Narula et al. (2015)                      | #N/A                         | brugada syndrome                                                                                                                           |
| GPI      | OMIM:neonatal death   stillbirth          | BIALLELIC                    | HEMOLYTIC ANEMIA, NONSPHEROCYTIC, DUE TO GLUCOSE PHOSPHATE ISOMERASE DEFICIENCY                                                            |
| GRIP1    | OMIM:stillborn                            | BIALLELIC                    | FRASER SYNDROME 3; FRASRS3                                                                                                                 |
| GUSB     | PMID:28749478                             | BIALLELIC                    | MUCOPOLYSACCHARIDOSIS TYPE 7                                                                                                               |
| HADHA    | OMIM:neonatal onset   sudden infant death | BIALLELIC                    | MITOCHONDRIAL TRIFUNCTIONAL PROTEIN DEFICIENCY; MTPD                                                                                       |
| HADHB    | OMIM:neonatal onset   sudden infant death | BIALLELIC                    | MITOCHONDRIAL TRIFUNCTIONAL PROTEIN DEFICIENCY; MTPD                                                                                       |
| HBA1     | PMID:20301608                             | BIALLELIC                    | Fetal hydrops;Thalassemia, alpha-, 604131                                                                                                  |
| HBA2     | PMID:20301608                             | BIALLELIC                    | Fetal hydrops;Thalassemia, alpha-, 604131                                                                                                  |
| HCN4     | Narula et al. (2015)                      | MONOALLELIC                  | brugada syndrome                                                                                                                           |
| HNF1B    | PMID:27297286                             | MONOALLELIC                  | RENAL CYSTS AND DIABETES SYNDROME                                                                                                          |
| HRAS     | PMID:20658932                             | MONOALLELIC                  | COSTELLO SYNDROME;CONGENITAL MYOPATHY WITH EXCESS OF MUSCLE SPINDLES                                                                       |
| HSPG2    | PMID:23836246                             | BIALLELIC                    | DYSEGMENTAL DYSPLASIA SILVERMAN-HANDMAKER TYPE;SCHWARTZ-JAMPEL SYNDROME                                                                    |
| HYLS1    | OMIM:stillborn                            | BIALLELIC                    | HYDROLETHALUS SYNDROME 1; HLS1                                                                                                             |
| ILK      | Narula et al. (2015)                      | #N/A                         | dilated cardiomyopathy                                                                                                                     |
| INPPL1   | PMID:25997753                             | BIALLELIC                    | OPSISMODYSPLASIA                                                                                                                           |
| INTU     | OMIM:neonatal demise                      | BIALLELIC                    | SHORT-RIB THORACIC DYSPLASIA 20 WITH POLYDACTYLY; SRTD20                                                                                   |
| INVS     | OMIM:neonatal death                       | BIALLELIC                    | NEPHRONOPHTHISIS 2; NPHP2                                                                                                                  |
| JAG1     | Narula et al. (2015)                      | MONOALLELIC                  | hypertrophic cardiomyopathy                                                                                                                |
| JPH2     | Narula et al. (2015)                      | MONOALLELIC                  | hypertrophic cardiomyopathy                                                                                                                |
| JUP      | Narula et al. (2015)                      | BOTH BIALLELIC & MONOALLELIC | arrhythmogenic cardiomyopathy                                                                                                              |
| KCND3    | Narula et al. (2015)                      | MONOALLELIC                  | brugada syndrome                                                                                                                           |
| KCNE1    | Narula et al. (2015)                      | BOTH BIALLELIC & MONOALLELIC | long QT syndrome                                                                                                                           |
| KCNE2    | Narula et al. (2015)                      | MONOALLELIC                  | long QT syndrome                                                                                                                           |
| KCNE3    | Narula et al. (2015)                      | #N/A                         | brugada syndrome                                                                                                                           |
| KCNH2    | Narula et al. (2015)                      | MONOALLELIC                  | long QT syndrome                                                                                                                           |
| KCNJ2    | Narula et al. (2015)                      | MONOALLELIC                  | long QT syndrome                                                                                                                           |
| KCNJ5    | Narula et al. (2015)                      | MONOALLELIC                  | long QT syndrome                                                                                                                           |
| KCNJ8    | Narula et al. (2015)                      | #N/A                         | brugada syndrome                                                                                                                           |
| KCNQ1    | Narula et al. (2015)                      | BOTH BIALLELIC & MONOALLELIC | long QT syndrome                                                                                                                           |
| KIAA1109 | PMID:29290337                             | BIALLELIC                    | Brain atrophy, Dandy Walker and Contractures;Alkuraya-Kucinskaskas syndrome, 617822                                                        |
| KLHL24   | OMIM:neonatal death                       | MONOALLELIC                  | EPIDERMOLYSIS BULLOSA SIMPLEX, GENERALIZED, WITH SCARRING AND HAIR LOSS; EBSSH                                                             |
| LAMA4    | Narula et al. (2015)                      | MONOALLELIC                  | dilated cardiomyopathy                                                                                                                     |
| LAMP2    | Narula et al. (2015)                      | X-LINKED DOMINANT            | hypertrophic cardiomyopathy                                                                                                                |
| LBD3     | Narula et al. (2015)                      | BIALLELIC                    | dilated cardiomyopathy   hypertrophic cardiomyopathy                                                                                       |
| LBR      | OMIM:fetal death                          | BOTH BIALLELIC & MONOALLELIC | GREENBERG DYSPLASIA; GRBGD                                                                                                                 |
| LMNA     | OMIM:stillbirth   Narula et al. (2015)    | MONOALLELIC                  | MUSCULAR DYSTROPHY, CONGENITAL, LMNA-RELATED   RESTRICTIVE DERMOPATHY, LETHAL                                                              |
| MKS1     | OMIM:perinatal death                      | BIALLELIC                    | MECKEL SYNDROME, TYPE 1; MKS1                                                                                                              |
| MUSK     | OMIM:stillborn                            | BIALLELIC                    | MYASTHENIC SYNDROME, CONGENITAL, 9, ASSOCIATED WITH ACETYLCHOLINE RECEPTOR DEFICIENCY; CMS9   FETAL AKINESIA DEFORMATION SEQUENCE 1; FADS1 |
| MYBPC3   | Narula et al. (2015)                      | MONOALLELIC                  | dilated cardiomyopathy   hypertrophic cardiomyopathy                                                                                       |
| MYH6     | Narula et al. (2015)                      | MONOALLELIC                  | dilated cardiomyopathy   hypertrophic cardiomyopathy                                                                                       |
| MYH7     | Narula et al. (2015)                      | BOTH BIALLELIC & MONOALLELIC | dilated cardiomyopathy   hypertrophic cardiomyopathy                                                                                       |
| MYL2     | Narula et al. (2015)                      | MONOALLELIC                  | hypertrophic cardiomyopathy                                                                                                                |
| MYL3     | Narula et al. (2015)                      | MONOALLELIC                  | hypertrophic cardiomyopathy                                                                                                                |
| MYLK2    | Narula et al. (2015)                      | MONOALLELIC                  | hypertrophic cardiomyopathy                                                                                                                |
| MYOM1    | Narula et al. (2015)                      | #N/A                         | hypertrophic cardiomyopathy                                                                                                                |
| MYOZ2    | Narula et al. (2015)                      | MONOALLELIC                  | hypertrophic cardiomyopathy                                                                                                                |
| MYPN     | Narula et al. (2015)                      | BOTH BIALLELIC & MONOALLELIC | dilated cardiomyopathy   hypertrophic cardiomyopathy                                                                                       |
| NDUFB11  | OMIM:neonatal death                       | X-LINKED                     | MITOCHONDRIAL COMPLEX I DEFICIENCY, NUCLEAR TYPE 1; MC1DN1   MITOCHONDRIAL COMPLEX I DEFICIENCY, NUCLEAR TYPE 30; MC1DN30                  |
| NEB      | PMID:28749478; PMID:29274205              | BIALLELIC                    | AUTOSOMAL RECESSIVE TYPICAL NEMALINE MYOPATHY                                                                                              |
| NEBL     | Narula et al. (2015)                      | #N/A                         | dilated cardiomyopathy                                                                                                                     |

|          |                                                                    |                              |                                                                                                                                                                        |
|----------|--------------------------------------------------------------------|------------------------------|------------------------------------------------------------------------------------------------------------------------------------------------------------------------|
| NEXN     | Narula et al. (2015)                                               | MONOALLELIC                  | dilated cardiomyopathy   hypertrophic cardiomyopathy                                                                                                                   |
| NIPBL    | PMID:30890023;<br>PMID:24189319                                    | MONOALLELIC                  | CORNELIA DE LANGE SYNDROME TYPE 1                                                                                                                                      |
| NKX2.5   | Narula et al. (2015)                                               | BIALLELIC                    | hypertrophic cardiomyopathy                                                                                                                                            |
| OFD1     | PMID:26147564                                                      | X-LINKED                     | JOUBERT SYNDROME TYPE 10;SIMPSON-GOLABI-BEHMEL SYNDROME TYPE 2;ORAL-FACIAL-DIGITAL SYNDROME TYPE 1                                                                     |
| PADI6    | OMIM:embryonic lethality                                           | BIALLELIC                    | PREIMPLANTATION EMBRYONIC LETHALITY 2; PREMBL2                                                                                                                         |
| PDLIM3   | Narula et al. (2015)                                               | #N/A                         | dilated cardiomyopathy                                                                                                                                                 |
| PHGDH    | OMIM:stillborn                                                     | BIALLELIC                    | NEU-LAXOVA SYNDROME 1; NLS1                                                                                                                                            |
| PIEZO1   | PMID:26333996;<br>PMID:31028252                                    | BOTH MONOALLELIC & BIALLELIC | hydrops fetalis gene 616843;Congenital lymphatic dysplasia with hydrops and/or lymphoedema                                                                             |
| PKD2     | OMIM:perinatal death                                               | MONOALLELIC                  | POLYCYSTIC KIDNEY DISEASE 2 WITH OR WITHOUT POLYCYSTIC LIVER DISEASE; PKD2                                                                                             |
| PKHD1    | PMID:19940839                                                      | BIALLELIC                    | POLYCYSTIC KIDNEY DISEASE, AUTOSOMAL RECESSIVE                                                                                                                         |
| PKP2     | Narula et al. (2015)                                               | MONOALLELIC                  | arrhythmogenic cardiomyopathy                                                                                                                                          |
| PKS      | OMIM:stillborn                                                     | Somatic mosaicism            | PALLISTER-KILLIAN SYNDROME; PKS                                                                                                                                        |
| PLEC1    | OMIM:onset: neonatal lethality                                     | BIALLELIC                    | EPIDERMOLYSIS BULLOSA SIMPLEX WITH MUSCULAR DYSTROPHY; EBSMD   EPIDERMOLYSIS BULLOSA SIMPLEX WITH PYLORIC ATRESIA; EBSPA                                               |
| PLN      | Narula et al. (2015)                                               | MONOALLELIC                  | dilated cardiomyopathy   hypertrophic cardiomyopathy                                                                                                                   |
| PLOD2    | PMID:29178448                                                      | BIALLELIC                    | BRUCK SYNDROME TYPE 2                                                                                                                                                  |
| POMT2    | PMID:28815891                                                      | BIALLELIC                    | MUSCULAR DYSTROPHY-DYSTROGLYCANOPATHY (CONGENITAL WITH MENTAL RETARDATION), TYPE B, 2; MDDGB2   MUSCULAR DYSTROPHY-DYSTROGLYCANOPATHY (LIMB-GIRDLE), TYPE C, 2; MDDGC2 |
| PRKAG2   | Narula et al. (2015)                                               | MONOALLELIC                  | hypertrophic cardiomyopathy                                                                                                                                            |
| PSEN1    | Narula et al. (2015)                                               | MONOALLELIC, Other           | dilated cardiomyopathy                                                                                                                                                 |
| PSEN2    | Narula et al. (2015)                                               | MONOALLELIC                  | dilated cardiomyopathy                                                                                                                                                 |
| PTEN     | OMIM:neonatal death   stillbirth                                   | BIALLELIC                    | VACTERL ASSOCIATION WITH HYDROCEPHALUS                                                                                                                                 |
| PTH1R    | PMID:9649554                                                       | BOTH MONOALLELIC & BIALLELIC | CHONDRODYSPLASIA BLOMSTRAND TYPE;EIKEN SKELETAL DYSPLASIA;JANSEN METAPHYSEAL CHONDRODYSPLASIA;PRIMARY FAILURE OF TOOTH ERUPTION                                        |
| PTPN11   | Narula et al. (2015)                                               | MONOALLELIC                  | hypertrophic cardiomyopathy                                                                                                                                            |
| RAF1     | Narula et al. (2015)                                               | MONOALLELIC                  | hypertrophic cardiomyopathy                                                                                                                                            |
| RANGRF   | Narula et al. (2015)                                               | #N/A                         | brugada syndrome                                                                                                                                                       |
| RAPSN    | OMIM:stillborn                                                     | BIALLELIC                    | MYASTHENIC SYNDROME, CONGENITAL, 11, ASSOCIATED WITH ACETYLCHOLINE RECEPTOR DEFICIENCY; CMS11   FETAL AKINESIA DEFORMATION SEQUENCE 1; FADS1                           |
| RBM20    | Narula et al. (2015)                                               | MONOALLELIC                  | dilated cardiomyopathy                                                                                                                                                 |
| REN      | PMID:22095942                                                      | BIALLELIC                    | Renal tubular dysgenesis 267430                                                                                                                                        |
| RET      | PMID:18252215                                                      | BOTH MONOALLELIC & BIALLELIC | RENAL AGENESIS;MULTIPLE ENDOCRINE NEOPLASIA IIB                                                                                                                        |
| RIPK4    | PMID:9738862                                                       | BIALLELIC                    | POPLITEAL PTERYGIUM SYNDROME, LETHAL TYPE                                                                                                                              |
| RNU4ATAC | OMIM:stillborn   stillbirth                                        | BIALLELIC                    | MICROCEPHALIC OSTEODYSPLASTIC PRIMORDIAL DWARFISM, TYPE I; MOPD1                                                                                                       |
| RPGRIP1L | OMIM:perinatal death                                               | BIALLELIC                    | COACH SYNDROME   MECKEL SYNDROME, TYPE 5; MKS5                                                                                                                         |
| RYR2     | Narula et al. (2015)                                               | MONOALLELIC                  | catecholaminergic polymorphic ventricular cardiomyopathy   arrhythmogenic cardiomyopathy                                                                               |
| SBDS     | PMID:17400792                                                      | BIALLELIC                    | SHWACHMAN-DIAMOND SYNDROME                                                                                                                                             |
| SCN1B    | Narula et al. (2015)                                               | BOTH BIALLELIC & MONOALLELIC | brugada syndrome                                                                                                                                                       |
| SCN3B    | Narula et al. (2015)                                               | MONOALLELIC                  | brugada syndrome                                                                                                                                                       |
| SCN4B    | Narula et al. (2015)                                               | MONOALLELIC                  | long QT syndrome                                                                                                                                                       |
| SCN5A    | OMIM:onset in utero   sudden infant death;<br>Narula et al. (2015) | BIALLELIC                    | SUDDEN INFANT DEATH SYNDROME   SICK SINUS SYNDROME 1; SSS1                                                                                                             |



|          |                                            |                              |                                                                                                                             |
|----------|--------------------------------------------|------------------------------|-----------------------------------------------------------------------------------------------------------------------------|
| SEC23B   | PMID:20381388                              | BIALLELIC                    | ANEMIA, DYSERYTHROPOIETIC CONGENITAL, TYPE II                                                                               |
| SGCD     | Narula et al. (2015)                       | BIALLELIC                    | dilated cardiomyopathy                                                                                                      |
| SGPL1    | OMIM:fetal demise                          | BIALLELIC                    | NEPHROTIC SYNDROME, TYPE 14; NPHS14                                                                                         |
| SLC17A5  | PMID:28749478                              | BIALLELIC                    | SALLA DISEASE;INFANTILE SIALIC ACID STORAGE DISORDER                                                                        |
| SLC26A2  | OMIM:stillborn                             | BIALLELIC                    | ATELOSTEOGENESIS, TYPE II; AO2   ACHONDROGENESIS, TYPE IB; ACG1B                                                            |
| SLC35D1  | OMIM:stillborn                             | BIALLELIC                    | SCHNECKENBECKEN DYSPLASIA; SHNKND                                                                                           |
| SMN1     | PMID:14968368                              | BIALLELIC                    | Spinal muscular atrophy 253550;Spinal muscular atrophy 271150;Spinal muscular atrophy 253400;Spinal muscular atrophy 253300 |
| SNTA1    | Narula et al. (2015)                       | MONOALLELIC                  | long QT syndrome                                                                                                            |
| STE24    | OMIM:stillbirth                            | BIALLELIC                    | RESTRICTIVE DERMOPATHY, LETHAL                                                                                              |
| STRA6    | PMID:19839040;<br>PMID:30204971            | BIALLELIC                    | MICROPTHALMIA SYNDROMIC TYPE 9                                                                                              |
| TAZ      | OMIM:fetal demise;<br>Narula et al. (2015) | X-LINKED                     | BARTH SYNDROME; BTHS                                                                                                        |
| TBX1     | Narula et al. (2015)                       | MONOALLELIC                  | hypertrophic cardiomyopathy                                                                                                 |
| TBX5     | Narula et al. (2015)                       | MONOALLELIC                  | hypertrophic cardiomyopathy                                                                                                 |
| TCAP     | Narula et al. (2015)                       | BOTH BIALLELIC & MONOALLELIC | dilated cardiomyopathy   hypertrophic cardiomyopathy                                                                        |
| TCOF1    | PMID:22729243                              | MONOALLELIC                  | TREACHER COLLINS SYNDROME TYPE 1                                                                                            |
| TGFB3    | Narula et al. (2015)                       | MONOALLELIC                  | arrhythmogenic cardiomyopathy                                                                                               |
| TLE6     | OMIM:embryonic lethality                   | BIALLELIC                    | PREIMPLANTATION EMBRYONIC LETHALITY 1; PREMBL1                                                                              |
| TMEM107  | OMIM:perinatal death                       | BIALLELIC                    | MECKEL SYNDROME 13; MKS13                                                                                                   |
| TMEM231  | PMID:27449316                              | BIALLELIC                    | Joubert syndrome 20 614970;Meckel syndrome 11 615397                                                                        |
| TMEM43   | Narula et al. (2015)                       | MONOALLELIC                  | arrhythmogenic cardiomyopathy                                                                                               |
| TMPO     | Narula et al. (2015)                       | #N/A                         | dilated cardiomyopathy                                                                                                      |
| TNNC1    | Narula et al. (2015)                       | MONOALLELIC                  | dilated cardiomyopathy   hypertrophic cardiomyopathy                                                                        |
| TNNI3    | Narula et al. (2015)                       | BOTH BIALLELIC & MONOALLELIC | dilated cardiomyopathy   hypertrophic cardiomyopathy                                                                        |
| TNNT2    | Narula et al. (2015)                       | MONOALLELIC                  | dilated cardiomyopathy   hypertrophic cardiomyopathy                                                                        |
| TPM1     | Narula et al. (2015)                       | MONOALLELIC                  | dilated cardiomyopathy   hypertrophic cardiomyopathy                                                                        |
| TRDN     | Narula et al. (2015)                       | BIALLELIC                    | catecholaminergic polymorphic ventricular cardiomyopathy                                                                    |
| TRIP11   | OMIM:stillborn                             | BIALLELIC                    | ACHONDROGENESIS, TYPE IA; ACG1A                                                                                             |
| TTC21B   | PMID:28749478                              | BIALLELIC                    | Short-rib thoracic dysplasia 4 with or without polydactyly 613819                                                           |
| TTN      | Narula et al. (2015)                       | BOTH BIALLELIC & MONOALLELIC | dilated cardiomyopathy   hypertrophic cardiomyopathy                                                                        |
| TTR      | Narula et al. (2015)                       | MONOALLELIC                  | dilated cardiomyopathy   hypertrophic cardiomyopathy                                                                        |
| TXNRD2   | Narula et al. (2015)                       | BIALLELIC                    | dilated cardiomyopathy                                                                                                      |
| UBR1     | PMID:21711208                              | BIALLELIC                    | JOHANSON-BLIZZARD SYNDROME                                                                                                  |
| VCL      | Narula et al. (2015)                       | MONOALLELIC                  | dilated cardiomyopathy   hypertrophic cardiomyopathy                                                                        |
| WT1      | PMID:26882358                              | MONOALLELIC                  | FRASIER SYNDROME FRASIER SYNDROME FRASIER SYNDROME;DENYS-DRASH SYNDROME                                                     |
| ZMPSTE24 | OMIM:stillbirth                            | BIALLELIC                    | RESTRICTIVE DERMOPATHY, LETHAL                                                                                              |

Table S2: Autopsy and ultrasound in stillbirth cohort (n=246)

| <b>Analysis</b>           | <b>N=246<br/>women</b> |
|---------------------------|------------------------|
| Ultrasound available      | 233 (94.7)             |
| Autopsy Consent           |                        |
| • None                    | 23 ( 9.3)              |
| • Limited                 | 47 ( 19.1)             |
| • Full                    | 176 ( 71.5)            |
| Autopsy and<br>Ultrasound |                        |
| • Neither                 | 2 (0.8)                |
| • Ultrasound<br>only      | 21 (8.5)               |
| • Autopsy only            | 11 (4.5)               |
| • Both                    | 212 (86.2)             |

Reporting: n (column percentage)

Table S3. Characteristics by completion of exome sequencing in the analysis among SCRNs stillbirths (n=663)<sup>a</sup>

| CHARACTERISTICS - unweighted %                          | SB sequenced and included in the analysis | SB not included in the analysis | p-value <sup>b</sup> |
|---------------------------------------------------------|-------------------------------------------|---------------------------------|----------------------|
| Unweighted sample size of stillborn babies <sup>b</sup> | 246                                       | 417                             |                      |
| Maternal age at delivery                                | 246                                       | 417                             | 0.9014               |
| < 20                                                    | 33 (13.4)                                 | 52 (12.5)                       |                      |
| 20-34                                                   | 176 (71.5)                                | 294 (70.5)                      |                      |
| 35-39                                                   | 28 (11.4)                                 | 52 (12.5)                       |                      |
| 40+                                                     | 9 (3.7)                                   | 19 (4.6)                        |                      |
| Maternal race ethnicity                                 | 246                                       | 416                             | 0.0170               |
| Non-Hispanic White                                      | 105 (42.7)                                | 129 (31.0)                      |                      |
| Non-Hispanic Black                                      | 48 (19.5)                                 | 94 (22.6)                       |                      |
| Hispanic                                                | 80 (32.5)                                 | 157 (37.7)                      |                      |
| Other                                                   | 13 (5.3)                                  | 36 (8.7)                        |                      |
| Maternal education                                      | 228                                       | 384                             | 0.1094               |
| 0-11 (none/primary/some secondary)                      | 44 (19.3)                                 | 101 (26.3)                      |                      |
| 12 (completed secondary)                                | 66 (28.9)                                 | 111 (28.9)                      |                      |
| 13+ (college)                                           | 118 (51.8)                                | 172 (44.8)                      |                      |
| Insurance/method of payment                             | 245                                       | 414                             | 0.1513               |
| No insurance                                            | 16 (6.5)                                  | 24 (5.8)                        |                      |
| Any public/private assistance                           | 117 (47.8)                                | 230 (55.6)                      |                      |
| VA/commercial health ins/ HMO                           | 112 (45.7)                                | 160 (38.6)                      |                      |
| Gestational age at delivery                             | 246                                       | 417                             | 0.7037               |
| 18 – 19 weeks                                           | 4 (1.6)                                   | 11 (2.6)                        |                      |
| 20 – 23 weeks                                           | 84 (34.1)                                 | 132 (31.7)                      |                      |
| 24 – 27 weeks                                           | 36 (14.6)                                 | 72 (17.3)                       |                      |
| 28 – 31 weeks                                           | 32 (13.0)                                 | 63 (15.1)                       |                      |
| 32 – 36 weeks                                           | 49 (19.9)                                 | 70 (16.8)                       |                      |
| 37+ weeks                                               | 41 (16.7)                                 | 69 (16.5)                       |                      |
| Plurality of pregnancy                                  | 246                                       | 417                             | N/A                  |
| Multiple birth                                          | 0 (0.0)                                   | 43 (10.3)                       |                      |
| Singleton                                               | 246 (100.0)                               | 374 (89.7)                      |                      |
| Parity                                                  | 245                                       | 416                             | 0.3163               |
| nulliparous                                             | 105 (42.9)                                | 195 (46.9)                      |                      |
| multiparous                                             | 140 (57.1)                                | 221 (53.1)                      |                      |

<sup>a</sup> SCRNs defined stillbirth as Apgar scores of 0/0 at 1 and 5 minutes with no signs of life by direct observation. Results are presented here for pregnancies. A pregnancy is defined as a SCRNs case if there were any stillbirths delivered.

Multiple births were not included in the analysis of the exome sequencing results.

<sup>b</sup> P-values from chi-square test for the comparisons of stillbirth included in the analysis compared to those who are not among those with INCODE analysis...

Table S4. Characteristics by completion of exome sequencing and inclusion in the analysis among SCRNs stillbirths with consent for genetic study of the stillborn baby (n=639)<sup>a</sup>

| CHARACTERISTICS - unweighted %                          | SB sequenced and included in the analysis | SB not included in the analysis | p-value <sup>b</sup> |
|---------------------------------------------------------|-------------------------------------------|---------------------------------|----------------------|
| Unweighted sample size of stillborn babies <sup>b</sup> | 246                                       | 393                             |                      |
| Maternal age at delivery                                | 246                                       | 393                             | 0.7839               |
| < 20                                                    | 33 (13.4)                                 | 46 (11.7)                       |                      |
| 20-34                                                   | 176 (71.5)                                | 278 (70.7)                      |                      |
| 35-39                                                   | 28 (11.4)                                 | 50 (12.7)                       |                      |
| 40+                                                     | 9 (3.7)                                   | 19 (4.8)                        |                      |
| Maternal race ethnicity                                 | 246                                       | 392                             | 0.0599               |
| Non-Hispanic White                                      | 105 (42.7)                                | 128 (32.7)                      |                      |
| Non-Hispanic Black                                      | 48 (19.5)                                 | 83 (21.2)                       |                      |
| Hispanic                                                | 80 (32.5)                                 | 149 (38.0)                      |                      |
| Other                                                   | 13 (5.3)                                  | 32 (8.2)                        |                      |
| Maternal education                                      | 228                                       | 366                             | 0.1161               |
| 0-11 (none/primary/some secondary)                      | 44 (19.3)                                 | 97 (26.5)                       |                      |
| 12 (completed secondary)                                | 66 (28.9)                                 | 103 (28.1)                      |                      |
| 13+ (college)                                           | 118 (51.8)                                | 166 (45.4)                      |                      |
| Insurance/method of payment                             | 245                                       | 390                             | 0.1524               |
| No insurance                                            | 16 (6.5)                                  | 21 (5.4)                        |                      |
| Any public/private assistance                           | 117 (47.8)                                | 217 (55.6)                      |                      |
| VA/commercial health ins/ HMO                           | 112 (45.7)                                | 152 (39.0)                      |                      |
| Gestational age at delivery                             | 246                                       | 393                             | 0.7391               |
| 18 – 19 weeks                                           | 4 (1.6)                                   | 9 (2.3)                         |                      |
| 20 – 23 weeks                                           | 84 (34.1)                                 | 120 (30.5)                      |                      |
| 24 – 27 weeks                                           | 36 (14.6)                                 | 68 (17.3)                       |                      |
| 28 – 31 weeks                                           | 32 (13.0)                                 | 60 (15.3)                       |                      |
| 32 – 36 weeks                                           | 49 (19.9)                                 | 68 (17.3)                       |                      |
| 37+ weeks                                               | 41 (16.7)                                 | 68 (17.3)                       |                      |
| Plurality of pregnancy                                  | 246                                       | 393                             | N/A                  |
| Multiple birth                                          | 0 (0.0)                                   | 41 (10.4)                       |                      |
| Singleton                                               | 246 (100.0)                               | 352 (89.6)                      |                      |
| Parity                                                  | 245                                       | 393                             | 0.4294               |
| nulliparous                                             | 105 (42.9)                                | 181 (46.1)                      |                      |
| multiparous                                             | 140 (57.1)                                | 212 (53.9)                      |                      |

<sup>a</sup> SCRNs defined stillbirth as Apgar scores of 0/0 at 1 and 5 minutes with no signs of life by direct observation. Results are presented here for pregnancies. A pregnancy is defined as a SCRNs case if there were any stillbirths delivered.

Multiple births were not included in the analysis of the exome sequencing results.

<sup>b</sup> P-values from chi-square test for the comparisons of stillbirth included in the analysis compared to those who are not among those with consent to genetic study of the baby..

Table S5 : Control cohort sources.

The controls used in this study were all individuals sequenced as healthy relatives to probands in various studies conducted at the Institute for Genomic Medicine.

| <b>No. Controls</b> | <b>Contributing individual or group</b>                                        |
|---------------------|--------------------------------------------------------------------------------|
| 4                   | A Ponduri                                                                      |
| 7                   | R Buckley                                                                      |
| 105                 | A Gharavi                                                                      |
| 11                  | M Harms                                                                        |
| 413                 | R Wapner                                                                       |
| 9                   | S Berkovic                                                                     |
| 2                   | N Delanty                                                                      |
| 9                   | M Harms                                                                        |
| 114                 | ET Cirulli                                                                     |
| 1250                | M Halvorsen                                                                    |
| 24                  | M Hauser                                                                       |
| 1                   | A Alkelai                                                                      |
| 2                   | Duke University Sequencing Clinic                                              |
| 7                   | Epilepsy Genetics Initiative                                                   |
| 854                 | Epilepsy Phenome/Genome Project (EPGP)                                         |
| 126                 | epi4k Consortium                                                               |
| 2                   | Duke Center for Human Genome Variation                                         |
| 10                  | Division of Personalized Genomic Medicine (PGM), Columbia University           |
| 3                   | Undiagnosed Disease Network Sequencing Clinic                                  |
| 9                   | Cold Spring Harbor Laboratory                                                  |
| 2897                | The Washington Heights, Inwood Columbia Aging Project                          |
| 2                   | Johns Hopkins University                                                       |
| 45                  | EpiGen Consortium                                                              |
| 12                  | Neonatal Intensive Care Unit, Columbia University Irving Medical Center        |
| 1233                | Institute for Genomic Medicine Sequencing Clinic (New York Presbyterian study) |
| 88                  | Institute for Genomic Medicine external collaboration (MEDIN)                  |
| <b>7239</b>         | <b>Total</b>                                                                   |

**Table S6: Suggestive variants identified in a stillborn.** Listed variants did not meet American College of Medical Genetics (ACMG) criteria for “pathogenic” or “likely pathogenic”, but were considered “suggestive” by a multidisciplinary team (see Methods in Supplementary Appendix). Two variants were identified in genes previous reported in stillbirth and four were identified in genes that represent strong candidates for phenotype expansion. OMIM disease = Disease association according to the Online Mendelian Inheritance in Man database. Het = heterozygous. Chet = compound heterozygous. Hom = homozygous. Hemi = hemizygous. AF = allele frequency. VOUS = Variant of Uncertain Significance in ClinVar. HGMD = Human Gene Mutation Database. DM = “Disease Mutation” in HGMD. Suggestive = committee classification of “suggestive” and not P/LP based on flags (see Methods in Supplementary Appendix).

| Body System | Gene   | Evidence of Association | OMIM disease                                    | Sample ID    | DNA source | best gestational age at death | ultrasound | autopsy | Structural Anomalies | “probable” INCODE cause of death | IUGR | IUGR       | Variant Effect Annotation | HGVS_c    | HGVS_p       | GT   | gnomAD AF       | Clinical Significance ClinVar   HGMD         | Clinical Disease ClinVar   HGMD                                    | Committee Classification |
|-------------|--------|-------------------------|-------------------------------------------------|--------------|------------|-------------------------------|------------|---------|----------------------|----------------------------------|------|------------|---------------------------|-----------|--------------|------|-----------------|----------------------------------------------|--------------------------------------------------------------------|--------------------------|
| Heart       | KCNH2  | PMID: 23571586          | Long QT syndrome 2   Short QT syndrome 1 609620 | stillborn389 | placenta   | 38.71                         | yes        | full    | none                 | none                             | no   |            | missense                  | c.3278C>T | p.Pro1093Leu | het  | 3.80E-05        | DM   VOUS                                    | Long_QT_syndrome   Congenital_long_QT_syndrome                     | suggestive               |
| Multisystem | PTPN11 | PMID: 25914815          | Noonan syndrome 1                               | stillborn126 | cord blood | 35.57                         | yes        | limited | none                 | none                             | yes  | 8.1%tile   | missense                  | c.1232C>T | p.Thr411Met  | het  | 1.22E-05        | Pathogenic                                   | Noonan_syndrome_1                                                  | suggestive               |
| Kidney      | GREB1L | NA                      | Renal hypodysplasia/aplasia 3                   | stillborn121 | placenta   | 38.57                         | yes        | full    | none                 | none                             | no   | 11.8%tile  | missense                  | c.5324G>A | p.Arg1775His | het  | 2.02E-05        | DM                                           | Renal_hypoplasia                                                   | suggestive               |
| Multisystem | BCOR   | NA                      | Microphthalmia syndromic 2                      | stillborn238 | placenta   | 33.29                         | yes        | full    | none                 | none                             | no   | 84.79%tile | missense                  | c.904C>A  | p.His302Asn  | hemi | 0               | NA                                           | NA                                                                 | suggestive               |
| Muscle      | DMD    | NA                      | Duchenne muscular dystrophy                     | stillborn365 | placenta   | 28.43                         | yes        | limited | none                 | none                             | yes  | 1.96%tile  | missense                  | c.6571C>T | p.Arg2191Trp | hemi | 3.82E-04; 0 hom | Conflicting interpretations of pathogenicity | Duchenne_muscular_dystrophy not_specified Cardiovascular_phenotype | suggestive               |
|             |        |                         |                                                 | stillborn093 | placenta   | 37.00                         | yes        | full    | none                 | umbilical cord                   | no   | 57.21%tile | missense                  | c.1066C>T | p.Leu356Phe  | hemi | 2.24E-05; 0 hom | VOUS                                         | Duchenne_muscular_dystrophy                                        | suggestive               |

Table S7. GO enrichment analysis for known disease genes with diagnostic genotypes in a stillborn case. We provide the top 50 most enriched Gene-Ontology (GO) biological processes ranked by adjusted P value. Enrichr was used for all GO enrichment analyses.

| Term                                                                                                          | Genes            | Overlap | P-value  | Adjusted P-value | Odds Ratio |
|---------------------------------------------------------------------------------------------------------------|------------------|---------|----------|------------------|------------|
| regulation of striated muscle contraction (GO:0006942)                                                        | HCN4;MYBPC3;RZR2 | 3/29    | 7.76E-07 | 0.001            | 159.151    |
| regulation of cardiac muscle cell contraction (GO:0086004)                                                    | HCN4;RZR2;DSC2   | 3/26    | 5.53E-07 | 0.001            | 177.515    |
| regulation of cardiac muscle cell action potential (GO:0098901)                                               | HCN4;RZR2;DSC2   | 3/24    | 4.31E-07 | 0.002            | 192.308    |
| regulation of ventricular cardiac muscle cell action potential (GO:0098911)                                   | RZR2;DSC2        | 2/11    | 2.14E-05 | 0.027            | 279.720    |
| cardiac muscle contraction (GO:0060048)                                                                       | MYBPC3;RZR2      | 2/36    | 2.43E-04 | 0.124            | 85.470     |
| regulation of cardiac muscle contraction (GO:0055117)                                                         | HCN4;RZR2        | 2/35    | 2.29E-04 | 0.130            | 87.912     |
| regulation of heart rate by cardiac conduction (GO:0086091)                                                   | HCN4;DSC2        | 2/35    | 2.29E-04 | 0.146            | 87.912     |
| positive regulation of ATPase activity (GO:0032781)                                                           | MYBPC3;RZR2      | 2/35    | 2.29E-04 | 0.167            | 87.912     |
| heart contraction (GO:0060047)                                                                                | MYBPC3;RZR2      | 2/44    | 3.63E-04 | 0.169            | 69.930     |
| ventricular cardiac muscle tissue morphogenesis (GO:0055010)                                                  | MYBPC3;RZR2      | 2/34    | 2.16E-04 | 0.184            | 90.498     |
| heart morphogenesis (GO:0003007)                                                                              | MYBPC3;RZR2      | 2/50    | 4.69E-04 | 0.200            | 61.538     |
| embryonic organ morphogenesis (GO:0048562)                                                                    | FBN2;RZR2        | 2/33    | 2.04E-04 | 0.208            | 93.240     |
| striated muscle contraction (GO:0006941)                                                                      | MYBPC3;RZR2      | 2/61    | 6.98E-04 | 0.274            | 50.441     |
| regulation of heart contraction (GO:0008016)                                                                  | HCN4;RZR2        | 2/95    | 0.002    | 0.613            | 32.389     |
| potassium ion import across plasma membrane (GO:1990573)                                                      | HCN4             | 1/9     | 0.006    | 0.677            | 170.940    |
| regulation of cardiac muscle cell action potential involved in regulation of contraction (GO:0098909)         | HCN4             | 1/8     | 0.005    | 0.679            | 192.308    |
| sarcoplasmic reticulum calcium ion transport (GO:0070296)                                                     | RZR2             | 1/9     | 0.006    | 0.693            | 170.940    |
| cellular response to purine-containing compound (GO:0071415)                                                  | RZR2             | 1/8     | 0.005    | 0.697            | 192.308    |
| ventricular cardiac muscle cell action potential (GO:0086005)                                                 | RZR2             | 1/15    | 0.010    | 0.708            | 102.564    |
| epithelial cell apoptotic process (GO:1904019)                                                                | RZR2             | 1/9     | 0.006    | 0.709            | 170.940    |
| response to purine-containing compound (GO:0014074)                                                           | RZR2             | 1/17    | 0.011    | 0.710            | 90.498     |
| embryonic eye morphogenesis (GO:0048048)                                                                      | FBN2             | 1/11    | 0.007    | 0.713            | 139.860    |
| positive regulation of DNA-templated transcription, initiation (GO:2000144)                                   | HNF1B            | 1/16    | 0.010    | 0.714            | 96.154     |
| response to epinephrine (GO:0071871)                                                                          | RZR2             | 1/8     | 0.005    | 0.716            | 192.308    |
| establishment of protein localization to endoplasmic reticulum (GO:0072599)                                   | RZR2             | 1/15    | 0.010    | 0.718            | 102.564    |
| positive regulation of glucose import in response to insulin stimulus (GO:2001275)                            | PTPN11           | 1/10    | 0.006    | 0.719            | 153.846    |
| membrane depolarization during cardiac muscle cell action potential (GO:0086012)                              | HCN4             | 1/17    | 0.011    | 0.719            | 90.498     |
| regulation of membrane depolarization (GO:0003254)                                                            | HCN4             | 1/16    | 0.010    | 0.724            | 96.154     |
| sequestering of extracellular ligand from receptor (GO:0035581)                                               | FBN2             | 1/7     | 0.005    | 0.724            | 219.780    |
| regulation of sequestering of calcium ion (GO:0051282)                                                        | RZR2             | 1/9     | 0.006    | 0.726            | 170.940    |
| import across plasma membrane (GO:0098739)                                                                    | HCN4             | 1/11    | 0.007    | 0.728            | 139.860    |
| sodium ion import across plasma membrane (GO:0098719)                                                         | HCN4             | 1/15    | 0.010    | 0.729            | 102.564    |
| positive regulation of transcription initiation from RNA polymerase II promoter (GO:0060261)                  | HNF1B            | 1/17    | 0.011    | 0.729            | 90.498     |
| calcium-mediated signaling using intracellular calcium source (GO:0035584)                                    | RZR2             | 1/18    | 0.012    | 0.733            | 85.470     |
| genitalia development (GO:0048806)                                                                            | PTPN11           | 1/16    | 0.010    | 0.734            | 96.154     |
| regulation of actin filament-based movement (GO:1903115)                                                      | MYBPC3           | 1/10    | 0.006    | 0.735            | 153.846    |
| cellular response to epinephrine stimulus (GO:0071872)                                                        | RZR2             | 1/8     | 0.005    | 0.736            | 192.308    |
| macromolecule biosynthetic process (GO:0009059)                                                               | COL1A1           | 1/19    | 0.012    | 0.737            | 80.972     |
| positive regulation of calcium ion transmembrane transporter activity (GO:1901021)                            | RZR2             | 1/17    | 0.011    | 0.738            | 90.498     |
| positive regulation of cell differentiation (GO:0045597)                                                      | FBN2;COL1A1      | 2/194   | 0.007    | 0.739            | 15.860     |
| positive regulation of viral release from host cell (GO:1902188)                                              | SMC3             | 1/15    | 0.010    | 0.739            | 102.564    |
| regulation of transcription initiation from RNA polymerase II promoter (GO:0060260)                           | HNF1B            | 1/13    | 0.008    | 0.741            | 118.343    |
| positive regulation by host of viral process (GO:0044794)                                                     | SMC3             | 1/11    | 0.007    | 0.742            | 139.860    |
| regulation of cellular response to growth factor stimulus (GO:0090287)                                        | FBN2             | 1/18    | 0.012    | 0.743            | 85.470     |
| embryonic heart tube development (GO:0035050)                                                                 | RZR2             | 1/16    | 0.010    | 0.744            | 96.154     |
| response to muscle stretch (GO:0035994)                                                                       | RZR2             | 1/9     | 0.006    | 0.745            | 170.940    |
| cardiac left ventricle morphogenesis (GO:0003214)                                                             | RZR2             | 1/14    | 0.009    | 0.746            | 109.890    |
| calcium ion transport into cytosol (GO:0060402)                                                               | RZR2             | 1/19    | 0.012    | 0.746            | 80.972     |
| release of sequestered calcium ion into cytosol by endoplasmic reticulum (GO:1903514)                         | RZR2             | 1/7     | 0.005    | 0.748            | 219.780    |
| regulation of cardiac muscle contraction by regulation of the release of sequestered calcium ion (GO:0010881) | RZR2             | 1/17    | 0.011    | 0.748            | 90.498     |

Table S8 : Results for the gene-based collapsing analysis of 246 stillborn cases and 7,239 healthy control exomes. The top 20 ranked genes from the “Known Pathogenic” model (i.e., variants that have been previously implicated as causing, when variant, disease). AD stillbirth gene = among the known dominant stillbirth genes aggregated by this group; Qualified case = number of cases carrying a qualifying variant under this model; Qualified Case Freq = proportion of cases carrying a qualifying variant; Qualified control = number of controls carrying a qualifying variant under this model; Qualified Case Freq = proportion of controls carrying a qualifying variant; Fet P = Fisher’s exact test two-sided p-value.

| Gene Name | AD stillbirth gene | Qualified Case | Qualified Case Freq | Qualified Ctrl | Qualified Ctrl Freq | Fet P    |
|-----------|--------------------|----------------|---------------------|----------------|---------------------|----------|
| PTPN11    | yes                | 3              | 0.0124              | 1              | 1.38E-04            | 1.29E-04 |
| WDR72     |                    | 2              | 0.0083              | 0              | 0                   | 0.001    |
| NPC1L1    |                    | 2              | 0.0083              | 1              | 1.38E-04            | 0.003    |
| NCF2      |                    | 2              | 0.0083              | 1              | 1.38E-04            | 0.003    |
| LAMA2     |                    | 3              | 0.0124              | 9              | 0.0012              | 0.0059   |
| SLCO2A1   |                    | 2              | 0.0083              | 2              | 2.76E-04            | 0.0059   |
| CRB1      |                    | 3              | 0.0124              | 10             | 0.0014              | 0.0074   |
| DARS2     |                    | 2              | 0.0083              | 3              | 4.14E-04            | 0.0097   |
| HNF1B     | yes                | 2              | 0.0083              | 3              | 4.14E-04            | 0.0097   |
| TK2       |                    | 2              | 0.0083              | 3              | 4.14E-04            | 0.0097   |
| AMT       |                    | 2              | 0.0083              | 5              | 6.91E-04            | 0.0195   |
| FAH       |                    | 2              | 0.0083              | 7              | 9.67E-04            | 0.0321   |
| C8B       |                    | 1              | 0.0041              | 0              | 0                   | 0.0322   |
| SUN2      |                    | 1              | 0.0041              | 0              | 0                   | 0.0322   |
| DCC       |                    | 1              | 0.0041              | 0              | 0                   | 0.0322   |
| PRKAR1A   |                    | 1              | 0.0041              | 0              | 0                   | 0.0322   |
| OGDHL     |                    | 1              | 0.0041              | 0              | 0                   | 0.0322   |
| RTTN      |                    | 1              | 0.0041              | 0              | 0                   | 0.0322   |
| HSPB1     |                    | 1              | 0.0041              | 0              | 0                   | 0.0322   |
| GP6       |                    | 1              | 0.0041              | 0              | 0                   | 0.0322   |
| RYR2      | yes                | 1              | 0.0041              | 0              | 0                   | 0.0322   |



Table S9: Samples (n=35) harboring at least one loss-of-function variant in a constrained (LOEUF  $\leq 0.239$ ) gene. LOEUF = gnomAD v2.1.1 loss-of-function observed/expected upper bound fraction. LOEUF threshold = AF = allele frequency; Passed IGV = Passed visual inspection in the Integrative Genomics Viewer (IGV); OMIM = Online Inheritance in Man database. GT = genotype.

| Gene Name | Sample Name     | HGVS_c                                                                                            | Effect          | Passed IGV | GT  | gnomAD Exome global AF | ClinVar Clinical Significance | OMIM Disease                                                                                                                                                                                         |
|-----------|-----------------|---------------------------------------------------------------------------------------------------|-----------------|------------|-----|------------------------|-------------------------------|------------------------------------------------------------------------------------------------------------------------------------------------------------------------------------------------------|
| ARID1B    | stillborn280    | c.2372-2A>C                                                                                       | splice acceptor | TRUE       | het |                        | Uncertain significance        | Coffin-Siris syndrome 1                                                                                                                                                                              |
| BRAF      | stillborn282    | c.2011C>T                                                                                         | stop gained     | TRUE       | het | 0                      | NA                            | Adenocarcinoma of lung somatic   Cardiofaciocutaneous syndrome   Colorectal cancer somatic   LEOPARD syndrome 3   Melanoma malignant somatic   Nonsmall cell lung cancer somatic   Noonan syndrome 7 |
| CASZ1     | stillborn015    | c.3382C>T                                                                                         | stop gained     | TRUE       | het | 0                      | NA                            | NA                                                                                                                                                                                                   |
| CDH11     | stillborn055    | c.453delC                                                                                         | frameshift      | TRUE       | het | 0                      | NA                            | NA                                                                                                                                                                                                   |
| COG3      | stillborn096    | c.1333C>T                                                                                         | stop gained     | TRUE       | het | 0                      | NA                            | NA                                                                                                                                                                                                   |
| CTNND2    | stillborn180    | c.1669C>T                                                                                         | stop gained     | TRUE       | het | 0                      | NA                            | NA                                                                                                                                                                                                   |
| DCLK1     | stillborn069    | c.188_189insGAGATAG                                                                               | frameshift      | TRUE       | het | 0                      | NA                            | NA                                                                                                                                                                                                   |
| DOCK9     | stillborn258    | c.2044-1G>C                                                                                       | splice acceptor | TRUE       | het | 0                      | NA                            | NA                                                                                                                                                                                                   |
| E2F1      | stillborn357    | c.1017dupC                                                                                        | frameshift      | TRUE       | het | 0                      | NA                            | NA                                                                                                                                                                                                   |
| ESRP1     | stillborn015    | c.31delC                                                                                          | frameshift      | TRUE       | het | 0                      | NA                            | NA                                                                                                                                                                                                   |
| FBN2      | stillborn316    | c.2034delG                                                                                        | frameshift      | TRUE       | het | 0                      | NA                            | Contractural arachnodyctly congenital   Macular degeneration early-onset                                                                                                                             |
| FMNL1     | stillborn212    | c.327+1G>A                                                                                        | splice donor    | TRUE       | het | 0                      | NA                            | NA                                                                                                                                                                                                   |
| FNBP4     | stillborn088    | c.2442_2443delTA                                                                                  | frameshift      | TRUE       | het | 0                      | NA                            | NA                                                                                                                                                                                                   |
| HCN4      | stillborn144    | c.1522dupA                                                                                        | frameshift      | TRUE       | het | 0                      | NA                            | Brugada syndrome 8   Sick sinus syndrome 2                                                                                                                                                           |
| HNF1B     | stillborn064    | c.1447C>T                                                                                         | stop gained     | TRUE       | het | 0                      | NA                            | Diabetes mellitus noninsulin-dependent   Renal cysts and diabetes syndrome   {Renal cell carcinoma}                                                                                                  |
| HNF1B     | stillborn011    | c.544+1G>A                                                                                        | splice donor    | TRUE       | het | 0                      | NA                            | Diabetes mellitus noninsulin-dependent   Renal cysts and diabetes syndrome   {Renal cell carcinoma}                                                                                                  |
| L3MBTL3   | stillborn389    | c.2284_2287delATT                                                                                 | frameshift      | TRUE       | het | 0                      | NA                            | NA                                                                                                                                                                                                   |
| MAPK8IP3  | stillborn185rep | c.440-1G>C                                                                                        | splice acceptor | TRUE       | het | 0                      | NA                            | NA                                                                                                                                                                                                   |
| MAU2      | stillborn077    | c.1769_1775delGGACAGA                                                                             | frameshift      | TRUE       | het | 0                      | NA                            | NA                                                                                                                                                                                                   |
| MSL1      | stillborn321rep | c.270delA                                                                                         | frameshift      | TRUE       | het | 0                      | NA                            | NA                                                                                                                                                                                                   |
| MYT1L     | stillborn077    | c.2637-2A>G                                                                                       | splice acceptor | TRUE       | het | 0                      | NA                            | Mental retardation autosomal dominant 39                                                                                                                                                             |
| NCDN      | stillborn310    | c.828delG                                                                                         | frameshift      | TRUE       | het | 0                      | NA                            | NA                                                                                                                                                                                                   |
| NCOA6     | stillborn425    | c.1010delC                                                                                        | frameshift      | TRUE       | het | 0                      | NA                            | NA                                                                                                                                                                                                   |
| NDC1      | stillborn297    | c.455+1G>C                                                                                        | splice donor    | TRUE       | het | 0                      | NA                            | NA                                                                                                                                                                                                   |
| NOL6      | stillborn348    | c.2995_2998delACAG                                                                                | frameshift      | TRUE       | het | 0                      | NA                            | NA                                                                                                                                                                                                   |
| NUP98     | stillborn193    | c.1497_1498delITC                                                                                 | frameshift      | TRUE       | het | 0                      | NA                            | NA                                                                                                                                                                                                   |
| PRMT5     | stillborn202    | c.1004delA                                                                                        | frameshift      | TRUE       | het | 0                      | NA                            | NA                                                                                                                                                                                                   |
| RNF2      | stillborn334    | c.72dupA                                                                                          | frameshift      | TRUE       | het | 0                      | NA                            | NA                                                                                                                                                                                                   |
| SPAG9     | stillborn267    | c.2965C>T                                                                                         | stop gained     | TRUE       | het | 0                      | NA                            | NA                                                                                                                                                                                                   |
| SRRM2     | stillborn433    | c.213_217delCGAGC                                                                                 | frameshift      | FALSE      | het | 0                      | NA                            | NA                                                                                                                                                                                                   |
| SRRM2     | stillborn433    | c.219_242+42delGGAGGA<br>GATGATGGAAGAGCAGG<br>GGTGAGGGAGAGCTGGG<br>GGAGAGTCAAGCACTGAA<br>TGAGTGCA | splice donor    | FALSE      | het | 0                      | NA                            | NA                                                                                                                                                                                                   |
| STK40     | stillborn440    | c.1252C>T                                                                                         | stop gained     | TRUE       | het | 0                      | NA                            | NA                                                                                                                                                                                                   |
| TAOK1     | stillborn266    | c.1563delC                                                                                        | frameshift      | TRUE       | het | 0                      | NA                            | NA                                                                                                                                                                                                   |
| VPS54     | stillborn327    | c.646delG                                                                                         | frameshift      | TRUE       | het | 0                      | NA                            | NA                                                                                                                                                                                                   |
| ZNF236    | stillborn186    | c.3181C>T                                                                                         | stop gained     | TRUE       | het | 0                      | NA                            | NA                                                                                                                                                                                                   |

Table S10. Comparison of loss-of-function signal in constrained ( $LOEUF \leq 0.239$ ) genes across INCODE clinical characteristics. Comparison of burden of loss-of-function variants in constrained genes between unexplained cases (n=80) and those with “probable” INCODE obstetric/placental/umbilical cord abnormalities (n=161). Conf.low = lower 95% confidence. Conf.high = upper 95% confidence interval. FET = Fisher’s exact test.

| Gene-set | odds ratio | p.value | conf.low | conf.high | method | alternative |
|----------|------------|---------|----------|-----------|--------|-------------|
| ALL      | 0.708      | 0.438   | 0.320    | 1.607     | FET    | two sided   |
| OMIM     | 0.470      | 0.302   | 0.105    | 2.109     | FET    | two sided   |
| NO_OMIM  | 1.062      | 1.000   | 0.411    | 2.985     | FET    | two sided   |

Table S11. GO biological processes enrichment analysis for stillbirth candidate disease genes. We provide the top 50 ranked Gene-Ontology (GO) biological processes from Enrichr. Enrichment for GO biological processes was ranked by adjusted P value. Overlap = the number of observed genes contained in the GO biological process / the total number of genes in the GO biological process.

| Term                                                                       | Genes                | Overlap | P-value  | Adjusted P-value | Odds Ratio |
|----------------------------------------------------------------------------|----------------------|---------|----------|------------------|------------|
| tRNA transport (GO:0051031)                                                | NDC1;NUP98;NOL6      | 3/35    | 1.10E-05 | 0.014            | 68.571     |
| tRNA export from nucleus (GO:0006409)                                      | NDC1;NUP98;NOL6      | 3/33    | 9.18E-06 | 0.016            | 72.727     |
| tRNA-containing ribonucleoprotein complex export from nucleus (GO:0071431) | NDC1;NUP98;NOL6      | 3/33    | 9.18E-06 | 0.023            | 72.727     |
| positive regulation of JUN kinase activity (GO:0043507)                    | SPAG9;TAOK1;MAPK8IP3 | 3/50    | 3.25E-05 | 0.033            | 48.000     |
| activation of JUN kinase activity (GO:0007257)                             | SPAG9;TAOK1;MAPK8IP3 | 3/30    | 6.85E-06 | 0.035            | 80.000     |
| JNK cascade (GO:0007254)                                                   | SPAG9;TAOK1;MAPK8IP3 | 3/66    | 7.49E-05 | 0.055            | 36.364     |
| nuclear pore complex assembly (GO:0051292)                                 | NDC1;NUP98           | 2/10    | 6.71E-05 | 0.057            | 160.000    |
| pore complex assembly (GO:0046931)                                         | NDC1;NUP98           | 2/14    | 1.35E-04 | 0.086            | 114.286    |
| nuclear pore organization (GO:0006999)                                     | NDC1;NUP98           | 2/15    | 1.56E-04 | 0.088            | 106.667    |
| RNA export from nucleus (GO:0006405)                                       | NDC1;NUP98;NOL6      | 3/119   | 4.29E-04 | 0.199            | 20.168     |
| RNA biosynthetic process (GO:0032774)                                      | PRMT5;NCOA6          | 2/26    | 4.79E-04 | 0.204            | 61.538     |
| activation of MAPK activity (GO:0000187)                                   | SPAG9;TAOK1;MAPK8IP3 | 3/117   | 4.09E-04 | 0.208            | 20.513     |
| regulation of generation of precursor metabolites and energy (GO:0043467)  | NDC1;NUP98           | 2/46    | 0.002    | 0.306            | 34.783     |
| nucleus organization (GO:0006997)                                          | NDC1;NUP98           | 2/45    | 0.001    | 0.319            | 35.556     |
| nuclear envelope disassembly (GO:0051081)                                  | NDC1;NUP98           | 2/46    | 0.002    | 0.319            | 34.783     |
| regulation of stress-activated MAPK cascade (GO:0032872)                   | TAOK1;MAPK8IP3       | 2/41    | 0.001    | 0.321            | 39.024     |
| regulation of coenzyme metabolic process (GO:0051196)                      | NDC1;NUP98           | 2/39    | 0.001    | 0.324            | 41.026     |
| neuron projection development (GO:0031175)                                 | CTNND2;NCDN;DCLK1    | 3/167   | 0.001    | 0.326            | 14.371     |
| protein complex subunit organization (GO:0071822)                          | NDC1;NUP98           | 2/45    | 0.001    | 0.333            | 35.556     |
| mitotic nuclear envelope disassembly (GO:0007077)                          | NDC1;NUP98           | 2/44    | 0.001    | 0.334            | 36.364     |
| regulation of ATP metabolic process (GO:1903578)                           | NDC1;NUP98           | 2/43    | 0.001    | 0.335            | 37.209     |
| regulation of G0 to G1 transition (GO:0070316)                             | E2F1;RNF2            | 2/39    | 0.001    | 0.345            | 41.026     |
| DNA damage checkpoint (GO:0000077)                                         | TAOK1;E2F1           | 2/38    | 0.001    | 0.349            | 42.105     |
| regulation of carbohydrate catabolic process (GO:0043470)                  | NDC1;NUP98           | 2/37    | 9.73E-04 | 0.355            | 43.243     |
| regulation of posttranscriptional gene silencing (GO:0060147)              | NDC1;NUP98           | 2/55    | 0.002    | 0.376            | 29.091     |
| negative regulation of G0 to G1 transition (GO:0070317)                    | E2F1;RNF2            | 2/37    | 9.73E-04 | 0.382            | 43.243     |
| regulation of gene silencing by RNA (GO:0060966)                           | NDC1;NUP98           | 2/55    | 0.002    | 0.390            | 29.091     |
| transport of virus (GO:0046794)                                            | NDC1;NUP98           | 2/54    | 0.002    | 0.390            | 29.630     |
| regulation of glycolytic process (GO:0006110)                              | NDC1;NUP98           | 2/57    | 0.002    | 0.390            | 28.070     |
| intracellular transport of virus (GO:0075733)                              | NDC1;NUP98           | 2/54    | 0.002    | 0.405            | 29.630     |
| endosomal transport (GO:0016197)                                           | SPAG9;VPS54;DCLK1    | 3/229   | 0.003    | 0.466            | 10.480     |
| protein sumoylation (GO:0016925)                                           | NDC1;NUP98           | 2/68    | 0.003    | 0.502            | 23.529     |
| regulation of gene silencing by miRNA (GO:0060964)                         | NDC1;NUP98           | 2/67    | 0.003    | 0.503            | 23.881     |
| regulation of cellular response to heat (GO:1900034)                       | NDC1;NUP98           | 2/78    | 0.004    | 0.638            | 20.513     |
| retrograde transport, endosome to Golgi (GO:0042147)                       | SPAG9;VPS54          | 2/82    | 0.005    | 0.664            | 19.512     |
| negative regulation of cell cycle process (GO:0010948)                     | E2F1;RNF2            | 2/81    | 0.005    | 0.667            | 19.753     |
| regulation of JNK cascade (GO:0046328)                                     | TAOK1;MAPK8IP3       | 2/90    | 0.006    | 0.775            | 17.778     |
| viral life cycle (GO:0019058)                                              | NDC1;NUP98           | 2/107   | 0.008    | 0.871            | 14.953     |
| mRNA export from nucleus (GO:0006406)                                      | NDC1;NUP98           | 2/105   | 0.008    | 0.878            | 15.238     |
| cellular response to DNA damage stimulus (GO:0006974)                      | NCOA6;TAOK1;E2F1     | 3/329   | 0.008    | 0.880            | 7.295      |
| glucocorticoid receptor signaling pathway (GO:0042921)                     | NCOA6                | 1/6     | 0.007    | 0.887            | 133.333    |
| viral gene expression (GO:0019080)                                         | NDC1;NUP98           | 2/110   | 0.008    | 0.899            | 14.545     |
| histone H2A-K119 monoubiquitination (GO:0036353)                           | RNF2                 | 1/8     | 0.010    | 0.907            | 100.000    |
| viral transcription (GO:0019083)                                           | NDC1;NUP98           | 2/113   | 0.009    | 0.908            | 14.159     |
| corticosteroid receptor signaling pathway (GO:0031958)                     | NCOA6                | 1/6     | 0.007    | 0.909            | 133.333    |
| peptidyl-lysine modification (GO:0018205)                                  | NDC1;NUP98           | 2/115   | 0.009    | 0.920            | 13.913     |
| Golgi organization (GO:0007030)                                            | PRMT5;COG3           | 2/121   | 0.010    | 0.923            | 13.223     |
| DNA replication (GO:0006260)                                               | NCOA6;NUP98          | 2/120   | 0.010    | 0.925            | 13.333     |
| mRNA-containing ribonucleoprotein complex export from nucleus (GO:0071427) | NDC1;NUP98           | 2/100   | 0.007    | 0.925            | 16.000     |

Figure S1: Flow diagram for case cohort. CCDS = consensus coding sequence. WES = whole exome sequence.

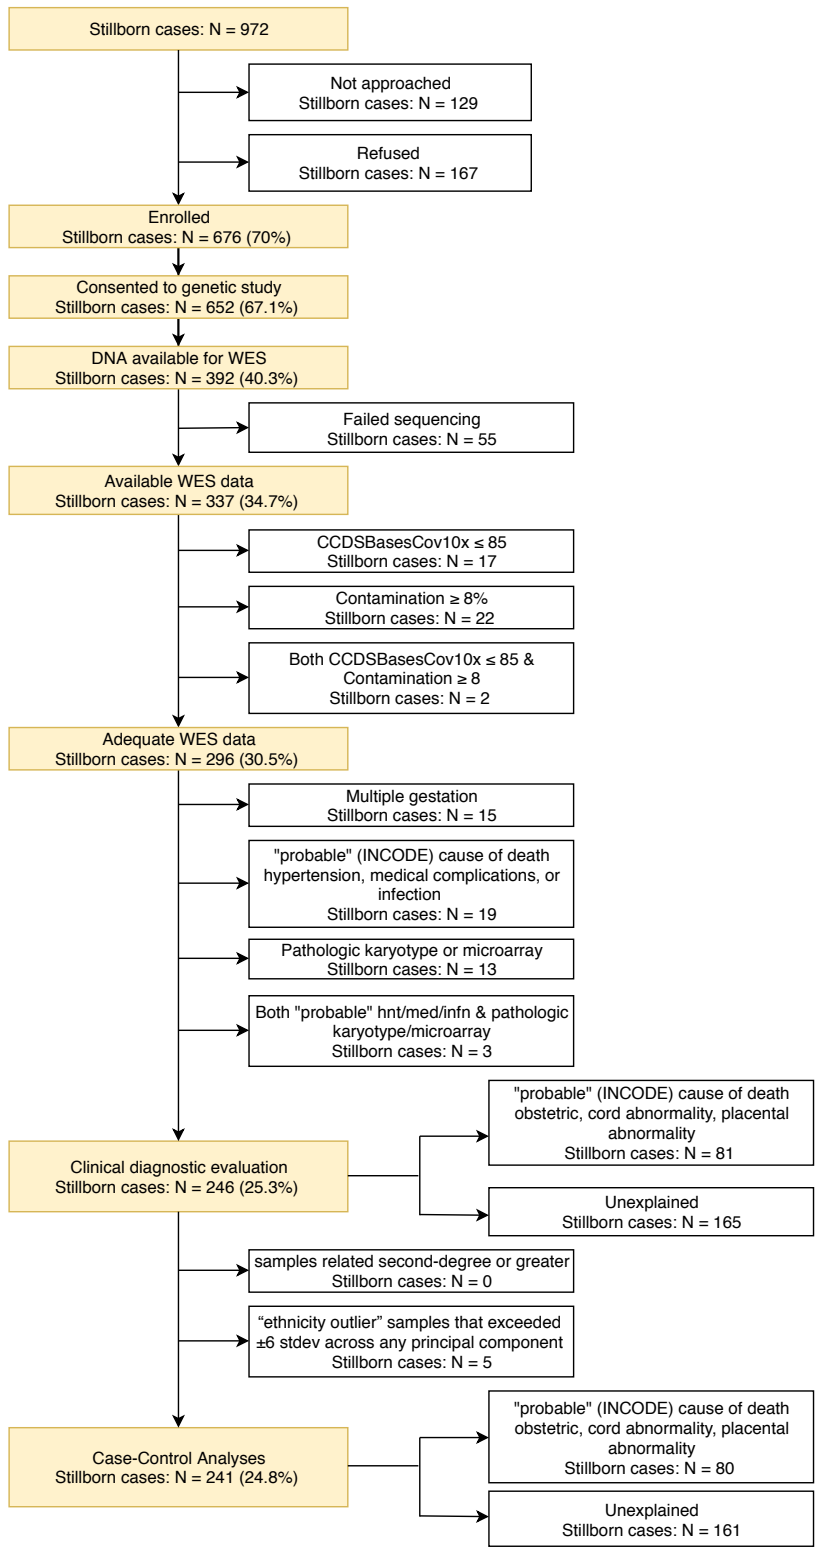

**Figure S2: Case-level diagnostic pipeline.** GATK = Genome Analysis Toolkit. Known pathogenic = previously reported as “Pathogenic” or “Likely pathogenic” in ClinVar or as “Disease Mutation” in the Human Gene Mutation Database. OMIM = Online Mendelian Inheritance in Man database. Novel = variant not previously reported as disease causing. PTV-intolerant = genes with a gnomAD 2.1 loss-of-function observed/expected upper bound fraction [LOEUF] < 0.35. HOM = homozygous variant. pCHET = possibly compound heterozygous variant. gnomAD hom = frequency of the homozygous genotype in gnomAD 2..1. Internal AF = allele frequency amongst internal cases and controls. External AF = allele frequency in external reference databases (gnomAD 2.1 & ExAC 3.0). IGV = Integrative Genome Viewer.

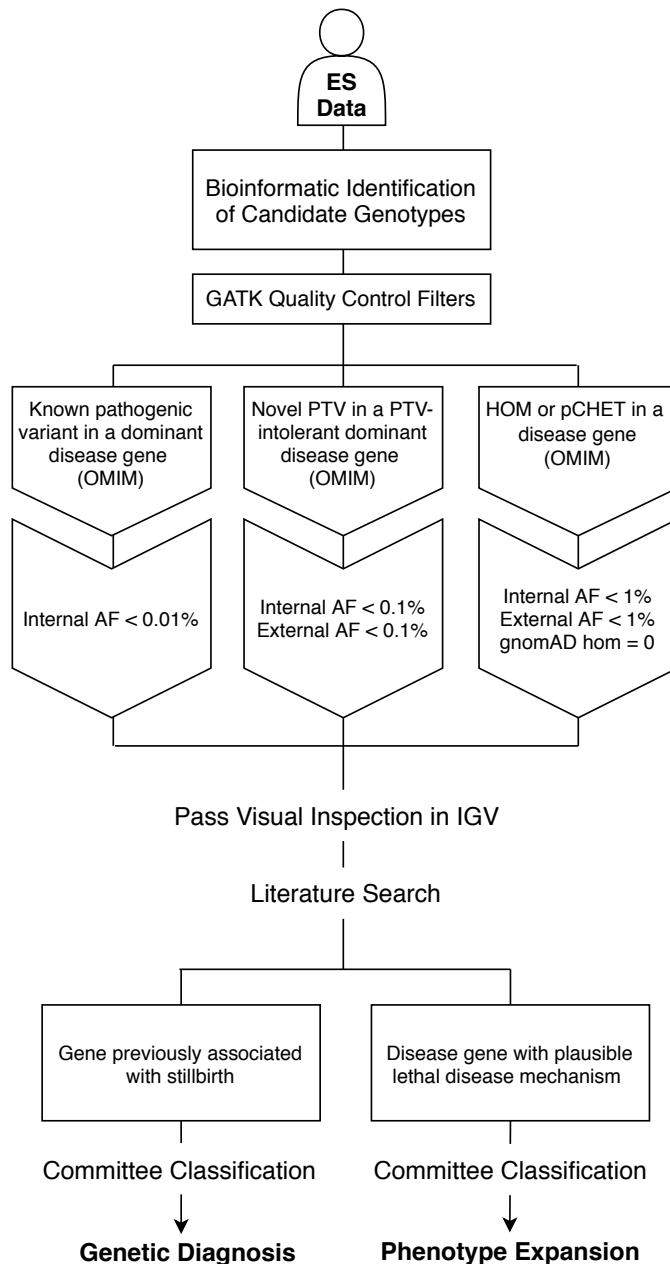

Figure S3. Cohort-level collapsing analysis work flow. CCDS = consensus coding sequence

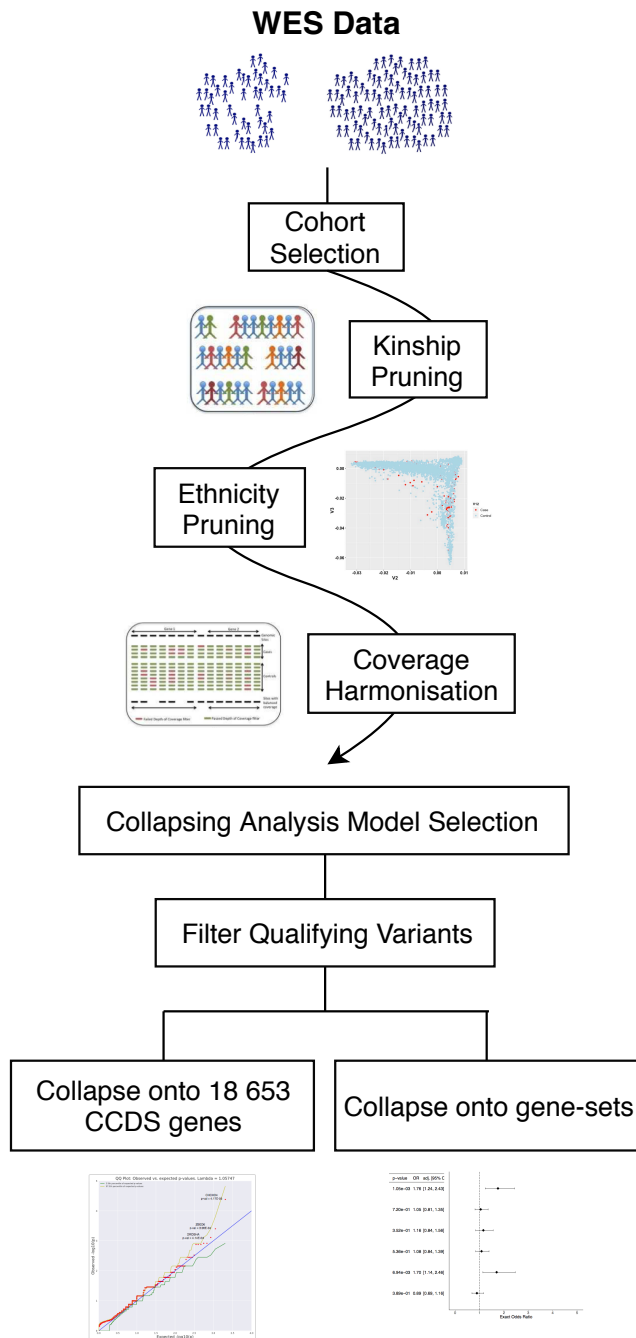

Figure S4 Principal components analysis for ancestry. (A) Principal component 1 vs 2, 2 vs 3 and 1 vs 3 for the case (red) and control (blue) cohort. (B) Cases and controls were retained only if they did not exceed 6 standard deviations along any principal component<sup>4</sup>.

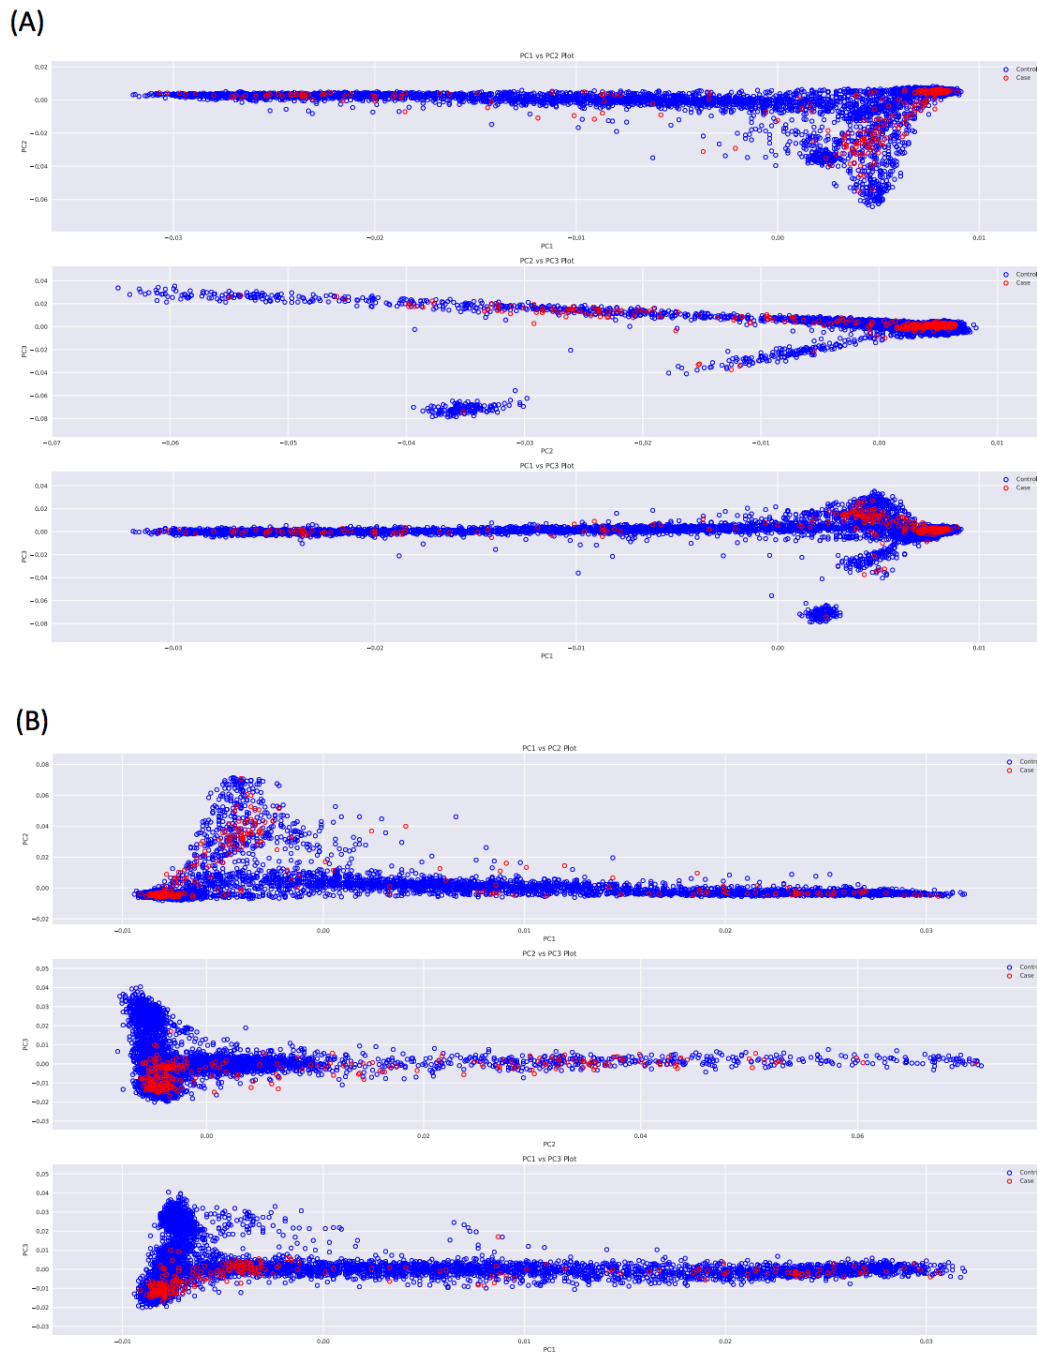

Figure S5. Quantile-quantile plots for the protein-coding genes that had at least one case or control qualifying variant per model. (A) Neutral synonymous model where qualifying variants are annotated as synonymous, have a minor allele frequency of less than 0.05% in internal case and control, and are absent in external reference cohorts (B) Ultra-rare damaging model where qualifying variants are annotated as loss-of-function, in-frame insertions or deletions, or missense variants predicted to be “probably” damaging by PolyPhen-2 (HumDiv) and have a minor allele frequency of less than 0.05% in internal case and control, and absent in external reference cohorts.(C) Rare loss-of-function model where qualifying variants are annotated as loss-of-function and have a minor allele frequency of less than 0.05% in internal case and control, and less than 0.01% in external reference cohorts (D) Known pathogenic model where qualifying variants are previously reported as “pathogenic” or “likely pathogenic” in ClinVar or “Disease Mutation” in HGMD and have a minor allele frequency of less than 0.01% in internal case and control. Bonferroni adjusted threshold of  $0.05/[18\,653 \times 3]=8.9 \times 10^{-7}$ . We did not correct for the neutral control model.

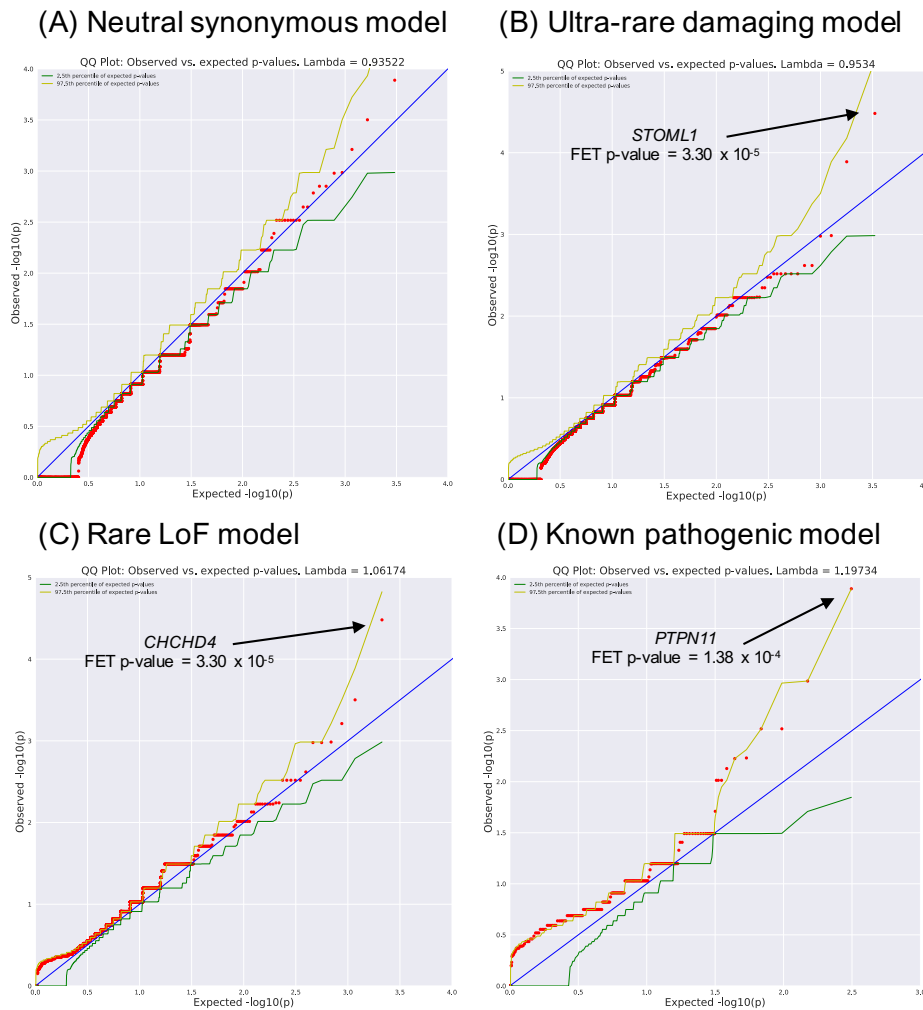



## Supplemental References

1. Ren, Z., Petrovski, S. & Cirulli, E. Analysis Tool for Annotated Variants—A comprehensive platform for population-scale genomic analyses. in (2016).
2. Gelfman, S. *et al.* A new approach for rare variation collapsing on functional protein domains implicates specific genic regions in ALS. *Genome Res.* gr.243592.118 (2019) doi:10.1101/gr.243592.118.
3. Petrovski, S. *et al.* An Exome Sequencing Study to Assess the Role of Rare Genetic Variation in Pulmonary Fibrosis. *Am. J. Respir. Crit. Care Med.* **196**, 82–93 (2017).
4. Cameron-Christie, S. *et al.* Exome-Based Rare-Variant Analyses in CKD. *J. Am. Soc. Nephrol.* **30**, 1109–1122 (2019).
5. Narula, N., Tester, D. J., Paulmichl, A., Maleszewski, J. J. & Ackerman, M. J. Post-Mortem Whole Exome Sequencing with Gene-Specific Analysis for Autopsy Negative Sudden Unexplained Death in the Young: A Case Series. *Pediatr Cardiol* **36**, 768–778 (2015).
6. Landrum, M. J. *et al.* ClinVar: public archive of relationships among sequence variation and human phenotype. *Nucleic Acids Res.* **42**, D980-985 (2014).
7. Stenson, P. D. *et al.* The Human Gene Mutation Database: towards a comprehensive repository of inherited mutation data for medical research, genetic diagnosis and next-generation sequencing studies. *Human Genetics* **136**, 665 (2017).

8. Epi4K consortium & Epilepsy Phenome/Genome Project. Ultra-rare genetic variation in common epilepsies: a case-control sequencing study. *Lancet Neurol* **16**, 135–143 (2017).
9. Karczewski, K. J. *et al.* Variation across 141,456 human exomes and genomes reveals the spectrum of loss-of-function intolerance across human protein-coding genes. *bioRxiv* 531210 (2019) doi:10.1101/531210.
